# 1 **Global distribution of anaerobic dichloromethane degradation potential**

2

3 Short Title: Anaerobic dichloromethane biodegradation

4

5 Robert W. Murdoch<sup>1</sup>†, Gao Chen<sup>1,2</sup>, Fadime Kara Murdoch<sup>1,7</sup>†, E. Erin Mack<sup>5</sup>, Manuel I. Villalobos Solis<sup>6</sup>,

6 Robert L. Hettich<sup>6</sup>, and Frank E. Löffler<sup>1,2,3,4,6\*</sup>

7 <sup>1</sup>Center for Environmental Biotechnology, <sup>2</sup>Department of Civil and Environmental Engineering,

8 <sup>3</sup>Department of Microbiology, <sup>4</sup>Department of Biosystems Engineering and Soil Science, University of

9 Tennessee, Knoxville, TN 37996, USA

10 <sup>5</sup>Corteva Environmental Remediation, Corteva Agriscience, Wilmington, DE 19805, USA

11 <sup>6</sup>Biosciences Division, Oak Ridge National Laboratory, Oak Ridge, TN 37831, USA

12 † Current address: Battelle Memorial Institute, Columbus, Ohio 43201

13 \* Corresponding author: Frank E. Löffler. Center for Environmental Biotechnology,

14 University of Tennessee, 676 Dabney Hall, 1416 Circle Drive, Knoxville, TN 37996-1605, USA

15 Phone: (865) 974 4933 **Email:** frank.loeffler@utk.edu

16 **Competing Interest Statement:** The authors declare no competing interest.

17 **Classification:** Biological Sciences (Major); Environmental Sciences (Minor)

18 **Keywords:** Dichloromethane fluxes, Degradation Potential, Bioremediation, Ozone Destruction

## 19 **Abstract**

20 Anthropogenic activities and natural processes release dichloromethane (DCM), a toxic chemical with

21 substantial ozone-depleting capacity. Specialized anaerobic bacteria metabolize DCM; however, the

22 genetic basis for this process has remained elusive. Comparative genomics of the three known

23 anaerobic DCM-degrading bacterial species revealed a homologous gene cluster, designated the

24 methylene chloride catabolism (*mec*) gene cassette, comprising eight to ten genes with predicted 79.6 –

25 99.7% amino acid identity. Functional annotation identified genes encoding a corrinoid-dependent

26 methyltransferase system, and shotgun proteomics applied to two DCM-catabolizing cultures revealed  
27 high expression of proteins encoded on the *mec* gene cluster during anaerobic growth with DCM. In a  
28 DCM-contaminated groundwater plume, the abundance of *mec* genes strongly correlated with DCM  
29 concentrations ( $R^2 = 0.71 - 0.85$ ) indicating their value as process-specific bioremediation biomarkers.  
30 *mec* gene clusters were identified in metagenomes representing peat bogs, the deep subsurface, and  
31 marine ecosystems including oxygen minimum zones (OMZs), suggesting DCM turnover in diverse  
32 habitats. The broad distribution of anaerobic DCM catabolic potential suggests a relevant control function  
33 for emissions to the atmosphere, and a role for DCM as a microbial energy source in critical zone  
34 environments. The findings imply that the global DCM flux might be far greater than emission  
35 measurements suggest.

36

### 37 **Importance**

38 Dichloromethane (DCM) is an increasing threat to stratospheric ozone with both anthropogenic and  
39 natural emission sources. Anaerobic bacterial metabolism of DCM has not yet been taken into  
40 consideration as a factor in the global DCM cycle. The discovery of the *mec* gene cassette associated  
41 with anaerobic bacterial DCM metabolism and its widespread distribution in environmental systems  
42 highlight a strong attenuation potential for DCM. Knowledge of the *mec* cassette offers new opportunities  
43 to delineate DCM sources, enables more robust estimates of DCM fluxes, supports refined DCM emission  
44 modeling and simulation of the stratospheric ozone layer, reveals a novel, ubiquitous C<sub>1</sub> carbon metabolic  
45 system, and provides prognostic and diagnostic tools supporting bioremediation of groundwater aquifers  
46 impacted by DCM.

## 47 **Introduction**

48 Dichloromethane (DCM, methylene chloride) is a widely distributed halomethane, produced both naturally  
49 and industrially. While anthropogenic DCM has received attention due to widespread groundwater  
50 contamination and, more recently ozone destruction potential, analysis of Antarctic ice cores has  
51 demonstrated that DCM was present in the atmosphere prior to the industrial era at approximately 10% of  
52 modern levels (Trudinger et al., 2004). The natural sources of DCM are diverse, encompassing both  
53 abiotic (Isidorov et al., 1990; Kanters & Louw, 1996) and biotic (Eustáquio et al., 2008; Hoekstra et al.,  
54 1998; Wuosmaa & Hager, 1990) processes and are estimated to contribute up to one third of total  
55 emissions (Gribble, 2010). Since the 1960's, atmospheric DCM concentrations rose steadily, with a mean  
56 annual increase of approximately 8% (Hossaini et al., 2017) although the reported worldwide production  
57 and use has been steady or declining since 2010 (McCulloch, 2017). Possible explanations include  
58 undocumented production, rogue emissions, or increased natural emissions reflecting environmental  
59 (e.g., climate) change responses.

60

61 Atmospheric measurements and corresponding efforts to extrapolate to global-scale emissions have led  
62 to the perception that marine systems and biomass combustion (e.g., wildfires) are the primary non-  
63 industrial sources of DCM (Gribble, 2010), releasing estimated amounts of 190 and 60 Gg of DCM each  
64 year, respectively. Natural and deliberate forest fires have increased in frequency and size (Haines et al.,  
65 2020), a global trend that can be expected to lead to further formation of DCM. Wetlands emit up to 2 Gg  
66 DCM per year (Cox et al., 2004; Hu et al., 2017; Kolusu et al., 2018) (Supplementary Information), and  
67 volcanic activity contributes an estimated amount of 0.021 Gg/y (Gribble, 2010). Halomethanes occur in  
68 crustal minerals, and DCM release from rocks from the near-surface and deep subsurface have been  
69 reported (Mulder et al., 2013; Svensen et al., 2009). Knowledge gaps remain and not-yet identified  
70 environmental sources of DCM are likely. The current understanding of global DCM fluxes, as opposed  
71 to emissions, is very limited (Figure 1) (McCulloch, 2017).

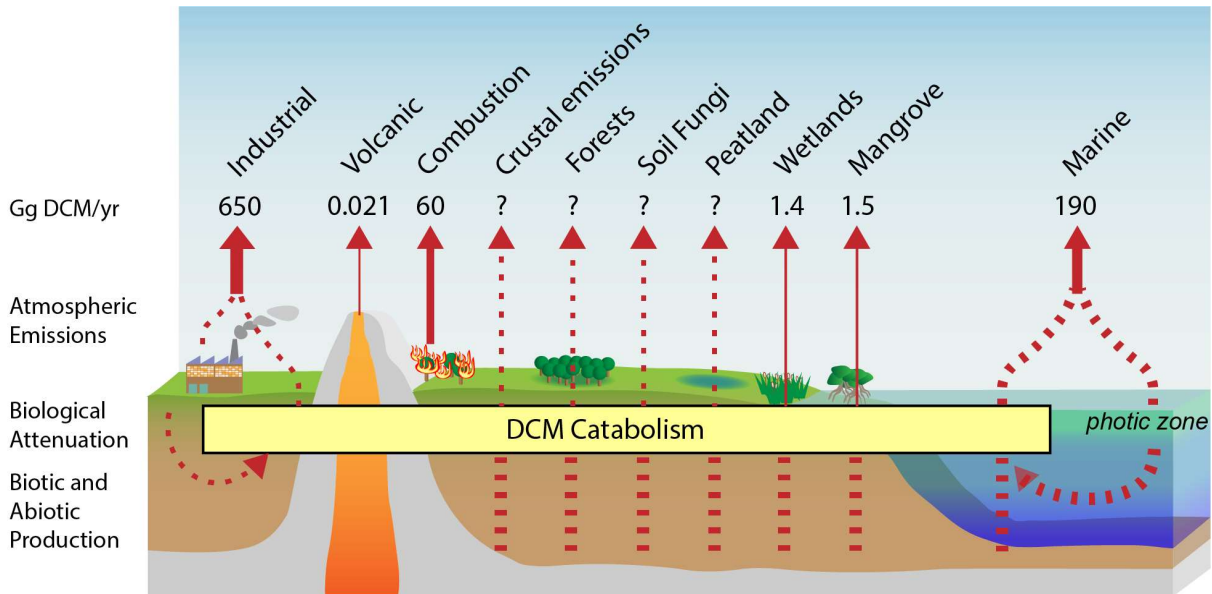

72

73

**Figure 1. Major reported or potential DCM atmospheric emission sources.** Width of the solid arrows is log-proportional to the magnitude of DCM emission estimates or potential. Dashed lines represent putative DCM sources, fluxes, and emissions that have not been directly investigated.

74

75

76

77

The rates of DCM production and consumption are unclear, and biological attenuation in anaerobic

78

systems prior to release to the atmosphere has not been incorporated into existing atmospheric emission

79

models (Hossaini et al., 2017).

80

81

Anaerobic metabolism of DCM was described in a bacterial isolate, *Dehalobacterium formicoaceticum*

82

strain DMC (Defo) (19). Two additional bacterial populations responsible for DCM-metabolism in

83

anaerobic enrichment cultures have been identified, '*Ca. Dichloromethanomonas elyunquensis*' (Diel)

84

(Justicia-Leon et al., 2012; Kleindienst et al., 2016, 2017) and '*Ca. Formimonas warabiya*' (Dcmf) (Holland

85

et al., 2021). All three DCM degraders are members of the family Peptococcaceae within the phylum

86

Firmicutes. Bacterial dechlorination of DCM under oxic conditions is catalyzed by the glutathione-S-

87

transferase (GST) DcmA (Muller et al., 2011); however, GST enzymes are generally absent in obligate

88

anaerobes (Allocati et al., 2009). Accordingly, anaerobes metabolize DCM following a distinct strategy, in

89

which the C<sub>1</sub> group is transferred to methylene-THF, a process that likely employs a corrinoid-dependent

90

methyltransferase. The resulting methylene-THF is then channeled into the Wood-Ljungdahl pathway

91 (WLP). Interestingly, Diel generates hydrogen during DCM mineralization to CO<sub>2</sub> and chloride, which  
92 necessitates a syntrophic partnership with a hydrogen-consuming population (G. Chen, Kleindienst, et al.,  
93 2017). In contrast, ‘*Ca. Formimonas warabiya*’ ferments DCM via intracellular syntrophy to acetate and  
94 chloride (Holland et al., 2021; Wiechmann et al., 2020) and axenic Defo cultures ferment DCM to acetate,  
95 formate and chloride (G. Chen, Murdoch, et al., 2017).

96

97 Due to the genetic intractability of anaerobic DCM-degrading bacteria, comparative genomic approaches  
98 were applied to unravel underlying conserved genes involved in DCM metabolism, which led to discovery  
99 of a novel conserved gene cluster. Proteomics applied to Diel and Defo grown with DCM supported a  
100 role of this gene cluster in anaerobic DCM metabolism. Tracing this gene cluster by analyzing public  
101 metagenome datasets and performing targeted qPCR assays revealed the prevalence of this gene  
102 cassette and the potential DCM-metabolizing phenotype in various environmental systems. The findings  
103 suggest DCM formation and consumption in diverse natural ecosystems and provide new opportunities  
104 for assessing how global changes in climate and habitat patterns impact DCM emissions and associated  
105 ozone destruction.

106

## 107 **Methods**

### 108 *Comparative genomics*

109 Initial identification of homologous genes shared between the genomes of Diel and Defo was performed  
110 by BLASTP-based reciprocal best hit (RBH) analysis within the Integrated Microbial Genomes (IMG)  
111 system (I.-M. A. Chen et al., 2019) and by using GView (Petkau et al., 2010). The two homologous gene  
112 clusters present in the Diel genome were manually delineated. A homologous gene cluster was identified  
113 in the genome of ‘*Ca. Formimonas warabiya*’ by application of local BLASTP searches (Altschul et al.,  
114 1990). Functional annotations (COG, pfam, KEGG, TIGRFAM) for Defo and Diel genes were obtained  
115 from the IMG system, while those of ‘*Ca. Formimonas warabiya*’ were assigned using the WebMGA  
116 server (Wu et al., 2011) for COG (Tatusov et al., 2000), pfam (El-Gebali et al., 2019), and TIGRFAM (Haft  
117 et al., 2012) annotations and GhostKOALA (Kanehisa et al., 2016) for KEGG annotations (Kanehisa et  
118 al., 2017).

119

### 120 *Metagenome searches*

121 All 18,314 metagenomes in the IMG database publicly available as of January 7, 2020 were subjected to  
122 BLASTP query with the Defo MecE protein sequence with a minimum bit score cutoff of 150  
123 (approximately 40% identity). The resulting protein set was further filtered by applying a RBH criterion,  
124 retaining only proteins whose closest BLAST-P hit to the IMG genomes database was found among the  
125 MecE sequences located in the putative *mec* gene cassettes. The candidate metagenome MecE  
126 homologs were then further filtered by retaining only proteins encoded by genes co-localized with at least  
127 one other *mec* cassette protein, applying the same RBH criterion. All proteins encoded by genes located  
128 on scaffolds where the *mec* protein homologs were identified were downloaded, subjected to local  
129 BLASTP query using the ten *mec* gene cassette proteins from Defo, and plotted using GenoPlotR and  
130 custom R scripts (Guy et al., 2010). Gene copy per genome for metagenome *mec* cassettes, provided in  
131 Dataset S1, were calculated by dividing the read depth of the corresponding scaffold by an average read  
132 depth of ten single copy conserved protein-encoding genes (ribosomal proteins L11 (COG0080), L1  
133 (COG0081), L3 (COG0087), L4 (COG0088), L2 (COG0090), L22 (COG0091), L5 (COG0094), L15  
134 (COG0200), L10 (COG0244), and L29 (COG0255)).

135

### 136 *Phylogenetic reconstruction*

137 The top 20 most similar proteins to each of the proteins encoded by each of the Defo genes located on  
138 the *mec* cassette were obtained by searching the IMG genome database using BLASTP with a  
139 confidence threshold of  $1e-5$ , except in the case of MecC, for which the threshold was  $1e-2$ . All *mec*  
140 cassette genes located in both genomes and metagenomes were aligned and subjected to phylogenetic  
141 reconstruction alongside the top 20 most similar genes located in microbial genomes in the IMG  
142 database. Proteins encoded by genes from metagenomes were clustered at 80% similarity using CD-hit  
143 (Li & Godzik, 2006). Sequences were aligned using MAFFT G-INS-I with 1,000 maximum iterations  
144 (Kato & Standley, 2013), trimmed using trimAl-gappyout (Capella-Gutiérrez et al., 2009) and subjected  
145 to phylogenetic reconstruction using FastTree2 maximum-likelihood estimation (Gamma-LG model) (Price  
146 et al., 2010). The resulting Newick tree files were visualized using the Interactive Tree of Life (Letunic &  
147 Bork, 2016).

148

149 *Preparation of Diel and Defo cultures for global proteomics*

150 The DCM-degrading consortium RM harboring '*Ca. Dichloromethanomonas elyunquensis*' (Diel) and the  
151 axenic culture *Dehalobacterium formicoaceticum* (Defo) were grown in triplicate in 100 mL of anoxic  
152 mineral basal salt medium with 0.2 mM sodium sulfide, 0.2 mM L-cysteine (Löffler et al., 2005) and 30  
153 mM bicarbonate (pH 7.3) under a headspace of N<sub>2</sub>/CO<sub>2</sub> (80:20, vol/vol) with 156 µmol (10 µL) of DCM as  
154 the sole energy source. Cultures were initiated with a 5% (vol/vol) inoculum, incubated at 30°C in the dark  
155 without agitation, and provided one additional feeding of DCM once the initial amendment was consumed.  
156 Biomass for (meta)proteomic analyses was collected after 2 weeks of incubation when approximately  
157 95% of the second DCM feedings were consumed. Culture suspensions were passed through Sterivex™  
158 0.22 µm membrane filter units (EMD Millipore Corporation, Billerica, MA, US) to capture cells. The outlet  
159 of the filters were capped, and 1.5 mL of boiling SDS lysis buffer (4% SDS in 100 mM Tris/HCl buffer, pH  
160 8.0) were added to each of them. Filter unit inlets were then capped and placed in a laboratory rocker for  
161 1-hour at room temperature. The SDS lysis buffer was removed by connecting 3 mL plastic syringes to  
162 the inlets of the cartridges, and then holding the syringes and filter units vertically and pushing air into  
163 each cartridge in order to withdraw as much lysate as possible by back pressure. In addition, filters were  
164 rinsed once more with 0.5 mL of fresh SDS lysis buffer. Lysate mixtures were centrifuged at 21,000 g for  
165 15 mins and the clean protein supernatant transferred to fresh Eppendorf plastic tubes. Proteins were  
166 precipitated with trichloroacetic acid (TCA), denatured in 8 M urea, reduced with dithiothreitol (DTT),  
167 alkylated with iodoacetamide (IAM), and digested with sequencing grade trypsin (Promega, 1:50 trypsin-  
168 to-protein [wt/wt]) (Yang et al., 2012). Protein concentrations were estimated with the BCA assay (Pierce  
169 Biotechnology, Waltham, MA, US) and crude protein and peptide extracts were stored at -80°C for  
170 subsequent LC-MS/MS analysis.

171

172 *Global proteomics analyses of Diel and Defo cultures*

173 Global proteomics analyses were performed with an Orbitrap Q Exactive Plus mass spectrometer  
174 (Thermo Fisher Scientific, Waltham, MA, US) equipped with a nano-electrospray source (ESI) interfaced  
175 with a Proxeon EASY-nLC™ 1200 system. Peptides (2 µg) from each sample were suspended in solvent

176 A (2% acetonitrile / 0.1% formic acid) and injected onto a C18 resin 75  $\mu\text{m}$  microcapillary column (1.7  $\mu\text{m}$ ,  
177 100 $\text{\AA}$ , Phenomenex). Separation was accomplished at a constant flow rate of 250 nL/min with a 90-  
178 minute gradient from 2 to 30% solvent B (0.1% formic acid / 80% acetonitrile) followed by an increase to  
179 40% solvent B within 10 minutes. Tandem mass spectrometry data (MS/MS) were collected using the  
180 Thermo Xcalibur software version 4.2.47 with similar parameters as reported before (Ganusova et al.,  
181 2021). Raw spectral files were searched against protein databases from the IMG annotated genomes of  
182 enrichment culture RM (which contains Diel) and Defo (IMG genome IDs 3300005804 and 2811995020,  
183 respectively), to which common laboratory contaminant proteins were appended. For standard database  
184 searching, the peptide MS/MS data was searched using Proteome Discoverer v2.4. The MS/MS data  
185 were searched using the SEQUEST HT algorithm (Eng et al., 1994) which was configured to derive fully  
186 tryptic peptides with the following settings: Maximum of 2 missed cleavage sites per peptide, minimum  
187 peptide length of 2, MS1 mass tolerance of 10 ppm and a MS2 tolerance of 0.02 Da. In addition,  
188 carbamidomethylations on cysteines (+57.0214 Da) and methionine oxidations (+5.9949 Da) were  
189 searched on peptides as static and dynamic modifications, respectively. Peptide spectrum match (PSM)  
190 confidence was evaluated with Percolator (Käll et al., 2007). PSMs and peptides were considered  
191 identified at a *q value* of < 0.01. Abundance values were converted to log<sub>2</sub> values for ease of  
192 visualization. The IMG gene IDs of detected culture RM proteins were mapped to proteins contained in  
193 the IMG annotated genome of Diel (IMG genome ID 2627853586, Dataset S2).

194

#### 195 *DCM measurements*

196 DCM was quantified by manual headspace injections (0.1 mL) into an Agilent 7890 gas chromatograph  
197 (GC) (Santa Clara, CA, USA) equipped with a DB-624 column (60 m length, 0.32 mm i.d., 1.8 mm film  
198 thickness) and a flame ionization detector (FID). To analyze DCM concentrations in groundwater, 1-mL  
199 samples were collected, immediately transferred to sealed 20-mL glass vials, and the DCM concentration  
200 determined in the headspace. Aqueous phase concentrations were determined using a dimensionless  
201 Henry's law constant of 0.0895 (Gossett, 1987).

202



203 *Environmental samples*

204 Anaerobic digester sludge was collected from two wastewater treatment plants, one located in Knoxville  
205 (KUB) and the other in Lenoir City (LC), TN. Groundwater samples from six monitoring wells representing  
206 within plume, fringe and outside locations at a DCM-contaminated site were obtained from CDM Smith  
207 (Wright et al., 2017). The groundwater samples were shipped with an overnight carrier in a cooler with  
208 ice and analyzed immediately upon receipt. Frank Stewart (Montana State University) provided archived  
209 DNA samples from two vertical transects from the ETNP OMZ.

210

211 *DCM enrichments*

212 Microcosms were established in 160-mL glass serum bottles containing 98 mL of anoxic mineral basal  
213 salt medium amended with 156  $\mu\text{mol}$  (10  $\mu\text{L}$ ) of DCM. The microcosms were seeded with 2 mL of  
214 digester sludge, and additional DCM feedings occurred upon the depletion of DCM. Microcosms showing  
215 DCM degradation were sequentially transferred to fresh anoxic medium with DCM as the sole electron  
216 donor with an inoculation volume of 3 mL. After eight consecutive transfers, solids-free enrichment cultures  
217 were obtained that degraded DCM under anoxic conditions. DNA samples were extracted from the new  
218 DCM enrichment cultures and used to examine the presence of *mecE* and *mecF* genes by qPCR.

219

220 *DNA extraction*

221 DNA extraction from 1 mL anaerobic digester sludge was performed using the DNeasy PowerSoil DNA  
222 extraction kit (Qiagen, Valencia, CA). DNA from Defo and Diel cultures was extracted from 5 mL culture  
223 suspensions collected onto 0.22  $\mu\text{m}$  Durapore membrane filters (Millipore, Cork, Ireland) and DNA using  
224 the DNeasy PowerLyzer PowerSoil DNA extraction kit (Qiagen, Valencia, CA) following the  
225 manufacturer's instructions.

226

227 Biomass from groundwater samples (950 mL) was collected on Supor® 0.2  $\mu\text{m}$  membrane filters (Pall  
228 Lab., Ann Arbor, MI). Each filter was cut in half using a sterile scalpel and each piece was placed into a  
229 separate bead-beating tube for extraction with the DNeasy PowerLyzer PowerSoil DNA kit. The extracted

230 DNA was concentrated with the Zymo DNA Clean and Concentrator-25 Kit (Zymo Research, Irvine, CA).  
231 DNA concentrations were determined with fluorometry and DNA was stored at -80°C until qPCR analysis.

232

### 233 *Primer design, PCR and qPCR analyses*

234 Primer sets were developed for both *mecE* and *mecF* genes. The design was based on the target gene  
235 alleles identified in the genomes of Diel, Defo, Dcmf, and strain UNSWDHB and the most similar  
236 homologs from peat bog metagenomes. Additional primers were designed based on the most common  
237 *mecE* and *mecF* alleles identified in Eastern Pacific OMZ metagenomes (IMG genome Ga0066828, gene  
238 IDs 100177932 [*mecE*] and 100027434 [*mecF*]). The respective target gene sequences were aligned  
239 using ClustalW and primer sets were designed using the Primer 3 plug-in in Geneious R11.0.2 (Kearse et  
240 al., 2012) for PCR and SYBR qPCR assays. The primer sequences were blasted against NCBI nr  
241 database using the Primer BLAST program to verify specificity of the assays. The primers were obtained  
242 from a commercial supplier (Integrated DNA Technologies, Coralville, IA). For quantification of total  
243 bacterial 16S rRNA genes, previously reported Bac1055YF/Bac1392R (Ritalahti et al., 2006) and  
244 EUB338F/EUB518R primers were used (Lane, 1991; Muyzer et al., 1993). Primer sequences are listed  
245 in Table 1.

246

247

248 **Table 1.** Novel primers used for qPCR. The column “Target” refers to the source of the template  
 249 alleles used to design and validate the primers. *peat*; *mec* gene homologs derived from *peat*  
 250 metagenomes.

| Assay | Primer            | Sequence (5'.....3')    | Target                                                         | Reference  |
|-------|-------------------|-------------------------|----------------------------------------------------------------|------------|
| qPCR  | <i>mecE</i> 828F  | ACCATATTGTCTTTTTGCCYCAG | Defo, Diel, Dcmf, <i>Dehalobacter</i> UNSWDHB, and <i>peat</i> | this study |
| qPCR  | <i>mecE</i> 1007R | TACCGCCCAAATTTYTCTGC    | Defo, Diel, Dcmf, <i>Dehalobacter</i> UNSWDHB, and <i>peat</i> | this study |
| qPCR  | <i>mecF</i> 554F  | TGCTTGACATGGCCGTAMTGGAC | Defo, Diel, Dcmf, <i>Dehalobacter</i> UNSWDHB, and <i>peat</i> | this study |
| qPCR  | <i>mecF</i> 641R  | GCAGGATADCCATATTTGTCTTT | Defo, Diel, Dcmf, <i>Dehalobacter</i> UNSWDHB, and <i>peat</i> | this study |
| qPCR  | <i>mecE</i> 98F   | ACGGCCTGACCTACAATGTC    | ETNP OMZ samples                                               | this study |
| qPCR  | <i>mecE</i> 191R  | GCCGTGATGTCATAGCCGTA    | ETNP OMZ samples                                               | this study |
| qPCR  | <i>mecF</i> 612F  | GCTCAAGGACAAGTACGGCT    | ETNP OMZ samples                                               | this study |
| qPCR  | <i>mecF</i> 698R  | CCGTATTGCTTCTTGCCGTG    | ETNP OMZ samples                                               | this study |
| qPCR  | EUB338F           | ACTCCTACGGGAGGCAGCAG    | All samples                                                    | 85         |
| qPCR  | EUB518R           | ATTACCGCGGCTGCTGG       | All samples                                                    | 86         |
| qPCR  | Bac1055YF         | ATGGYTGTGTCAGCT         | All samples                                                    | 84         |
| qPCR  | Bac1392R          | ACGGGCGGTGTGTAC         | All samples                                                    | 84,85      |

251  
 252  
 253 qPCR was performed in 10- $\mu$ L volumes consisting of 5  $\mu$ L 2X Power SYBR Green PCR Master Mix  
 254 (Applied Biosystems, Foster City, CA), 0.5  $\mu$ L of each primer (final concentration of 300 nM) and 2  $\mu$ L of  
 255 template DNA (undiluted, 1:10 and 1:100 dilutions). qPCR analysis was conducted using a QuantStudio  
 256 12K Flex Real Time qPCR System (Life Technologies, Carlsbad, CA) and the thermocycling program was  
 257 followed as initial step of 10 min at 95°C, 40 cycles of 15 sec at 95°C and 1 min at 60°C. Specific  
 258 amplification was confirmed by melt curve analysis and agarose gel electrophoresis as described (Hatt &  
 259 Löffler, 2012). Standard curves were established with linear GeneArt DNA fragments of target genes.  
 260 Standards were run as triplicate on each plate using ten-fold dilution series in the range of 10<sup>1</sup> to 10<sup>8</sup> gene

261 copies/ $\mu$ L. The amplification efficiencies, linear dynamic range, slope, Y-intercept and  $R^2$  values are listed  
262 in Dataset S3. Amplification efficiencies (AE) were calculated using the equation  $10^{(-1/\text{slope})} - 1$ .

263

#### 264 *Metatranscriptomics*

265 Unprocessed Illumina metatranscriptome sequencing data generated from groundwater from a DCM  
266 contamination plume was provided by CDM Smith. This same site was previously the subject of 16S  
267 rRNA gene amplicon library analysis (Wright et al., 2017). Raw data were trimmed using Trimmomatic  
268 v0.35 with a 6:25 sliding window quality trim, Illumina adapter read-through contamination removal, and  
269 final minimum length of 25 bp (Bolger et al., 2014). Trimmed reads were assembled *de novo* using Trinity  
270 v2.8.5 under default parameters (Grabherr et al., 2011). Prokaryotic ribosomal RNA genes were detected  
271 in the transcript contigs using barrnap v0.9-2 (Seeman, 2018) and removed using a custom R script  
272 employing Biostrings v2.5.4 (Pagès et al., 2019). Remaining transcripts were queried against a database  
273 consisting of all Defo *mec* genes using TBLASTX. Transcripts aligning to at least *mecE* with a bit-score  
274 of >1,000 (approximately 70% full-length amino acid alignment) were included. Transcript coverage was  
275 calculated using kallisto (Bray et al., 2016) and TPM values were calculated using the Trinity utility script  
276 align\_and\_estimate\_abundance.pl.

277

278

## 279 **Results**

### 280 *Anaerobic DCM degraders share a common gene cassette*

281 Comparative analysis of the Defo and Diel genomes revealed that the eight most similar genes (and 10 of  
282 the top 25 most similar genes) in terms of percent predicted amino acid identity were located in genetic  
283 clusters. The genome of Defo harbors a single 10-gene cluster and Diel has two highly similar clusters A  
284 and B (Figure 2, Dataset S4).

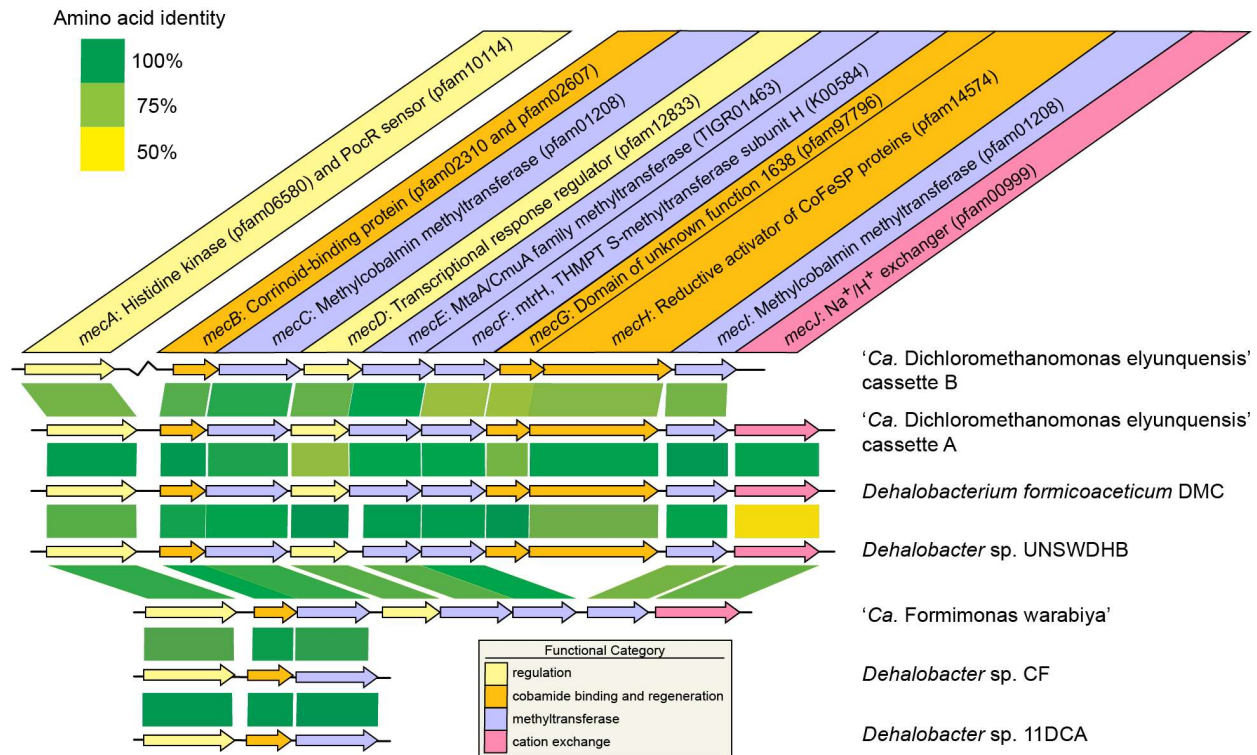

285

286 **Figure 2. *mec* metabolic gene cassettes and close homologs identified in genomes.**

287 Shaded boxes represent BLASTP amino acid identity scores. The colors represent the general

288 functional category of the encoded protein. Function was inferred from functional annotation

289 systems, with priority given to the TIGRFAM and KEGG systems. GenoPlotR(26) was used to

290 parse BLASTP results and gene coordinates to generate the figure.

291

292 The gene arrangement in these clusters is identical (i.e., syntenic) and predicted amino acid identities

293 between clusters range from 79.6% to 99.7% (Figure 2). This novel, conserved 10-gene *mec* cassette

294 harbors *mecA* through *mecJ* implicated in **m**ethylene **c**hloride catabolism. A homologous gene cassette

295 was also found in the newly described DCM degrader '*Ca. Formimonas warabiya*' (Holland et al., 2019),

296 although lacking *mecG* and *mecH*. Aside from *mecJ*, the only close homologs in any prokaryotic genome

297 to any of the *mec*-encoded proteins are found in the genomes of three chloroform degrading bacteria; a

298 homologous 10-gene cassette in *Dehalobacter* sp. strain UNSWDHB and partial gene cassettes in

299 *Dehalobacter* sp. strain CF and *Dehalobacter* sp. strain 1,1-DCA (Figure 2). Functional annotation of the

300 *mec* cassette gene products revealed a histidine kinase sensory protein and an associated regulatory

301 protein (MecAD), an MtaA/CmuA methyltransferase (MecE), an MtrH methyltransferase (MecE), two  
 302 methyltransferases of indeterminate function (MecCI), a corrinoid-binding protein (MecB), a cation  
 303 transporter/antiporter (MecJ), a reductive activator of corrinoid proteins (MecH), and a protein with a  
 304 conserved domain of unknown function (MecG) (Table 2 and Supplementary Text).

305

306 **Table 2.** Consensus functional annotations of the putative *mec* cassette gene product proteins.

307 COG, Clusters of Orthologous Genes; TIGRFAM, The Institute for Genomic Research's

308 Database of Protein Families; pfam, Protein Families; KEGG, Kyoto Encyclopedia of Genes and

309 Genomes.

| Protein | Annotation          | Description                                                                                        |
|---------|---------------------|----------------------------------------------------------------------------------------------------|
| MecA    | pfam06580           | histidine kinase                                                                                   |
|         | pfam10114           | sensory domain found in PocR                                                                       |
| MecB    | COG5012             | methanogenic corrinoid protein MtbC1                                                               |
|         | pfam02310           | B <sub>12</sub> -binding                                                                           |
|         | pfam02607           | B <sub>12</sub> -binding 2                                                                         |
|         | TIGR02370<br>K00548 | methyltransferase cognate corrinoid proteins<br>methH, 5-methyl-THF-homocysteine methyltransferase |
| MecC    | COG0407             | uroporphyrinogen III decarboxylase                                                                 |
|         | pfam01208           | uroporphyrinogen decarboxylase                                                                     |
|         | K01599              | uroporphyrinogen decarboxylase                                                                     |
| MecD    | pfam00072           | translational response regulator receiver domain                                                   |
|         | pfam12833           | helix-turn-helix domain                                                                            |
| MecE    | COG0407             | uroporphyrinogen III decarboxylase                                                                 |
|         | pfam01208           | uroporphyrinogen decarboxylase                                                                     |
|         | TIGR01463           | methyltransferase, MtaA/CmuA family                                                                |
| MecF    | COG1962             | tetrahydromethanopterin S-methyltransferase, subunit H                                             |
|         | pfam02007           | MtrH, tetrahydromethanopterin S-methyltransferase subunit H                                        |
|         | TIGR01114           | N5-methyltetrahydromethanopterin:coenzyme M methyltransferase subunit H                            |
|         | K00584              | MtrH, tetrahydromethanopterin S-methyltransferase subunit H                                        |
| MecG    | pfam07796           | domain of unknown function 1638                                                                    |
| MecH    | COG3894             | uncharacterized 2Fe-2 and 4Fe-4S clusters-containing protein                                       |
|         | pfam14574           | C-terminal of reductive activator of CoFeSP (RACo)                                                 |
|         | pfam00111           | 2Fe-2S iron-sulfur cluster binding domain                                                          |
| MecI    | pfam01208           | uroporphyrinogen decarboxylase                                                                     |
| MecJ    | COG0475             | Kef-type K <sup>+</sup> transport system, membrane component KefB                                  |
|         | pfam00999           | sodium/hydrogen exchanger family                                                                   |
|         | K03455              | monovalent cation:H <sup>+</sup> antiporter-2, CPA2 family                                         |
|         | K03499              | KtrA, trk system potassium uptake protein                                                          |

310

311 *Mec* proteins are expressed during growth on DCM

312 When grown with DCM, a total of 1,781 proteins were detected in the axenic Defo culture (Dataset S5)

313 and 1,743 proteins were detected in the metaproteome of mixed culture RM, 797 of which were assigned

314 to Diel (Dataset S2). The majority of proteins encoded by the *mec* gene cassettes were detected in the

315 proteomes of both DCM degraders (Figure 3, Table S1).

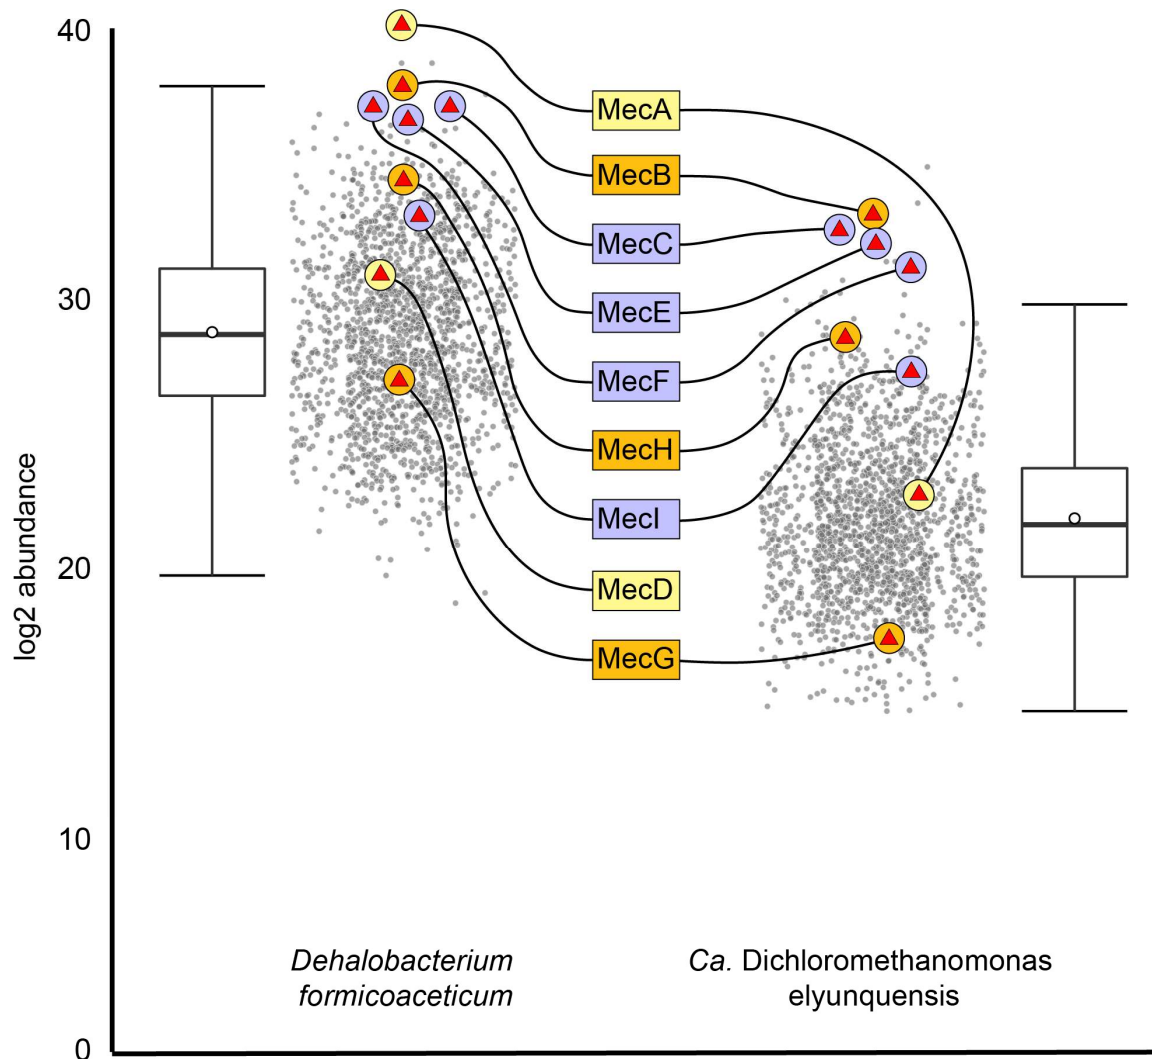

316

317 **Figure 3. Mec protein abundance in the proteomes of Defo and Diel when grown**

318 **anaerobically with DCM as the sole carbon and energy source.** Box and whisker plots show

319 median (central horizontal line), upper and lower quartile range (box), highest and lowest values

320 excluding outliers (upper and lower whiskers) and mean value (open circle). Protein products of



321 the *mec* cassette genes are labelled, with general functional category indicated by color (orange,  
322 corrinoid-related; purple, methyltransferase; yellow, regulatory).

323

324 In Diel, all proteins of *mec* cassette B were detected except for MecD and MecJ while in Defo, all but  
325 MecJ were detected. The corrinoid-binding protein MecB was the 2<sup>nd</sup> and 3<sup>rd</sup> most abundant protein in  
326 Defo and Diel proteomes, respectively. The three methyltransferases MecC, MecE, and MecF were in  
327 the top 1% most abundant proteins in both proteomes. The fourth methyltransferase MecI and the  
328 corrinoid protein reductive activator MecH were all in the upper quartile of detected proteins. The sensor  
329 histidine kinase MecA was 1<sup>st</sup> and 38<sup>th</sup> most abundant in Defo and Diel proteomes, respectively. In  
330 neither case was MecJ detected, although its predicted eleven transmembrane alpha helices suggest  
331 strong association with the cytoplasmic membrane, likely hindering detection in the proteomics  
332 measurements (Vit & Petrak, 2017).

333

334 *DCM enriches for bacteria harboring mec genes*

335 Targeted qPCR assays for the *mecE* and *mecF* genes did not yield quantifiable signals with template  
336 DNA extracted from anaerobic digester sludge. Following enrichment with DCM using the same  
337 anaerobic sludge as inoculum,  $1 \times 10^6$  to  $5 \times 10^7$  gene copies/mL of both *mecE* and *mecF* were measured  
338 in transfer cultures, consistent with the observed consumption of DCM (Figure S1).

339

340 Groundwater samples from a DCM plume provided a unique opportunity to explore *mec* gene abundance  
341 and expression in response to varying DCM concentrations. *mecE*- and *mecF*-targeted qPCR assays  
342 yielded signals in a DCM dose-dependent manner, with ratios of *mec* gene copy number versus total  
343 bacterial 16S rRNA gene copy numbers ranging between 4% and 10% in groundwater from wells with 3.2  
344 mg/L DCM or higher (Figure 4B).



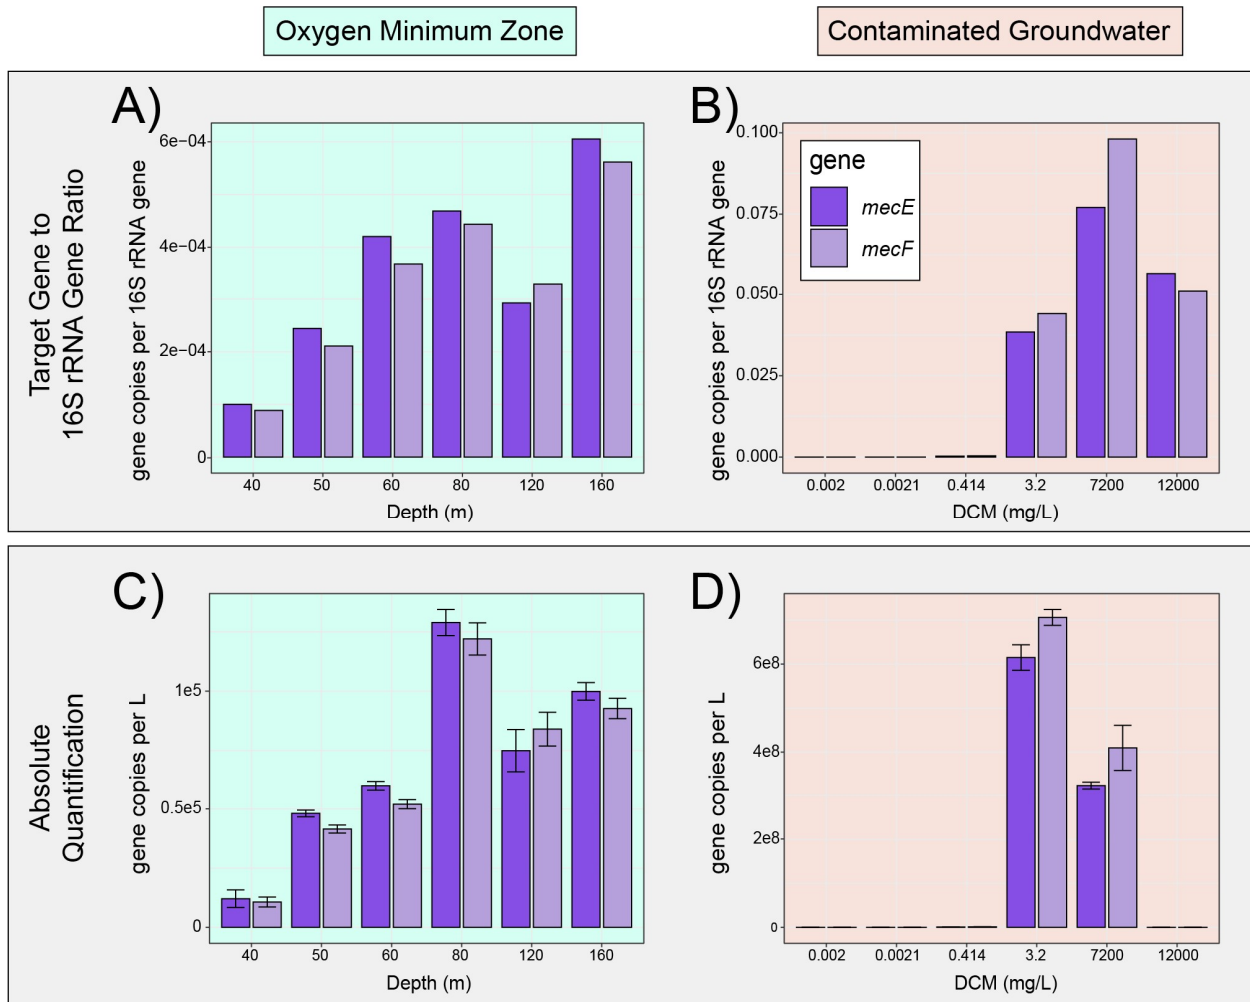

345  
346 **Figure 4. Quantitative PCR of *mecE* and *mecF* in the Eastern Pacific oxygen minimum zone**  
347 **(OMZ) and from groundwater samples from a DCM plume.** A) and B) represent relative  
348 quantification results expressed as gene copies per 16S rRNA gene copy number for OMZ and  
349 DCM groundwater plume samples, respectively. Panels C) and D) represent absolute  
350 quantification (i.e., qPCR) results for OMZ and DCM groundwater plume

351  
352 At lower DCM concentrations of 1.47 mg/L, the relative abundance of *mec* genes dropped to 0.029%, and  
353 in wells at the fringe of the plume with DCM in the low  $\mu\text{g/L}$  range, *mec* gene to 16S rRNA gene ratios  
354 dropped to 0.0004 – 0.0026% (Figure 4B). Absolute *mec* gene copy numbers followed this trend, except  
355 for samples collected from the well with the highest DCM concentration of 12 g/L, where lower  
356 abundances of bacterial and archaeal 16S rRNA genes were observed (i.e.,  $1.44 \times 10^6$  versus  $3.57 \times 10^9$ )

357 –  $1.60 \times 10^{10}$  16S rRNA genes per L at locations with lower DCM concentrations) (Figure 4D). Absolute  
358 target gene copy numbers and ratios of target genes to total bacterial 16S rRNA copy numbers both  
359 covaried with measured DCM concentrations, with no detections outside the plume and *mec* gene to 16S  
360 rRNA gene ratios of up to 10% within the plume, indicating that roughly 1 in 10 bacterial genomes in the  
361 plume harbored a *mec* cassette.

362

363 Analysis of metatranscriptomes, previously obtained for groundwater microbiomes collected from the  
364 same DCM-contaminated site, revealed expression of *mec* cassette genes. *mecE* and *mecF* were  
365 consistently identified on the same transcript, with relative expression reaching its highest value of 44.6  
366 transcripts per million transcripts (TPM) in wells located in the plume fringes. *mec* cassette transcripts  
367 were also detected in groundwater samples in the core plume at relative expression levels up to 21.2  
368 TPM (Table S2).

369

#### 370 *Environmental distribution of the mec cassette*

371 The search of over 18,000 metagenomes identified similar gene cassettes in 41 metagenomes from  
372 peatland, the deep subsurface, and marine systems (Figure 5, Figure S2). The SI provides gene and  
373 genome IDs and detailed BLAST-P results (Table S3, Dataset S6, Dataset S7).

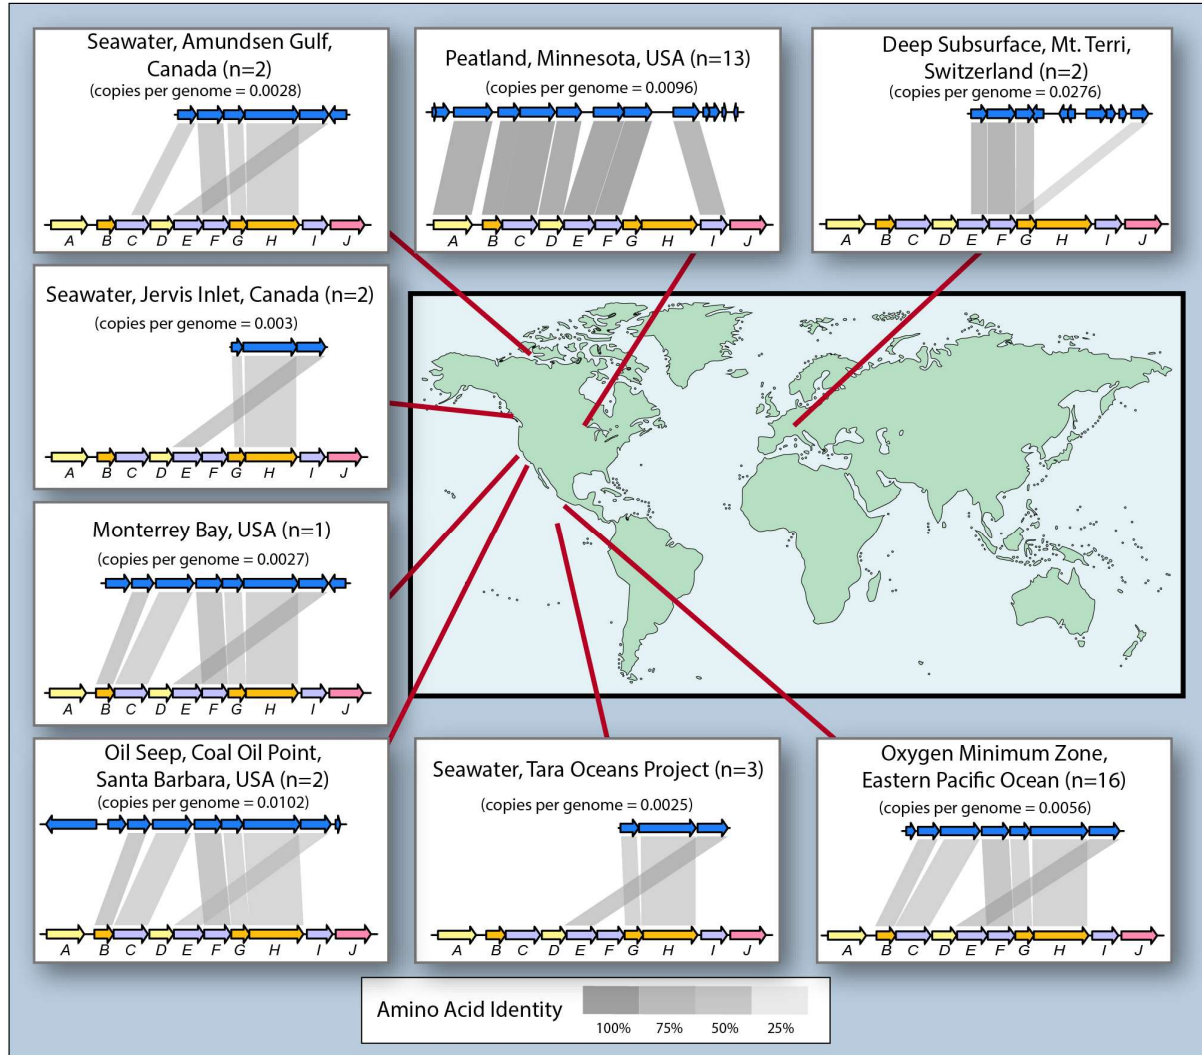

374

375

376

377

378

379

380

381

382

383

384

**Figure 5. Distribution of 41 gene cassettes with homology and synteny to the Defo *mec* cassette.** Identified in the IMG metagenome database, details provided in Dataset S7.

Representative cassettes from the eight environments, in which the cassettes were identified, are shown. The red lines point to the approximate locations from where the metagenomes were derived. In each gene cassette illustration, the lower, multicolored gene cassette represents the *D. formicoaceticum mec* cassette, while the blue, upper illustration represents the gene cassette found in the indicated environmental metagenome. “n” indicates the number of individual samples, in which a syntenic cassette was identified, while “copies per genome” indicates the estimate of cassette copy per total genomes present in the metagenome, as determined by comparing cassette read depth to the average read depth of ten single-copy protein-encoding

385 genes for the cassette shown. Shaded boxes show the BLAST-P-derived amino acid identity  
386 allowing comparisons of gene-product identities.

387

388 *mec* cassettes were identified in 13 of 117 metagenomes from ombrotrophic peat bogs in the Marcell  
389 experimental forest in Minnesota, USA. The *mec* cassettes were predominantly (i.e., 10 out of 13 gene  
390 cassettes) identified in metagenomes from samples collected between 1 – 1.5 m depth, where the pH  
391 was approximately 4.5 and anoxic conditions prevailed (Chris Schadt, personal communication). Two  
392 cassettes organized as *mecABCDEFGHI* displayed predicted amino acid identity scores to the Defo *mec*  
393 cassette genes above 80% (Figure 2) and close phylogenetic affiliation (Figure S3). This *mecABCDEFGHI*  
394 cassette was most prevalent, present in nearly 1% of all genome copies (i.e., approximately 1 out of 100  
395 prokaryotic cells in the community harbor a *mec* cassette) (Dataset S7).

396

397 A total of 23 *mec* gene cassettes were identified in metagenomes from samples collected beneath the  
398 photic zone of the oceanic water column. The majority of cassettes was identified in metagenomes from  
399 the Eastern Pacific oxygen minimum zone (OMZ) at depths of 150 m to 400 m, wherein oxygen was  
400 below the limit of detection (Thamdrup et al., 2019). Additional cassettes detected in metagenomes  
401 derived from three coastal sites, Monterey Bay, CA, Jervis Inlet in British Columbia, Canada, and  
402 Amundsen Gulf, in Arctic northern Canada, and from an open ocean sample from the Eastern Tropical  
403 North Pacific (ETNP). The marine *mec* cassettes were syntenic, with the order *mecBCFGHE* (Figure 5).  
404 *mecE* and *mecF* were the most similar to the corresponding Defo homologs, with average amino acid  
405 identities of 49.7 - 51.6%. All of the marine *mec* genes were more closely related to one another and to  
406 the *mec* cassette genes of the characterized DCM degraders than to any other gene in assembled  
407 metagenomes or genomes available in NCBI or the IMG database. The marine *mec* gene clusters  
408 formed distinct, deeply branching clades (Figure S3). The highest marine *mec* cassette occurrence was  
409 observed in a sample from Coal Oil Point, CA, a natural marine petroleum seep area (present in 1.02% of  
410 total genome copies) (Dataset S7). qPCR applied to water column samples from two ETNP OMZ  
411 locations detected *mecE* and *mecF* at a higher frequency (9 out of 11) than they were found in the ETNP

412 OMZ metagenome assemblies (16 out of 90), with target gene-to-bacterial 16S rRNA gene ratios of 0.01  
413 – 0.06% (Figure 4, Dataset S8).

414

415 Evidence was obtained for the presence of *mecEFG* in anoxic porewater from a hydrogen-amended  
416 borehole in Opalinus Clay rock situated 300 m beneath Mt. Terri, Switzerland (Bagnoud et al., 2016).  
417 The amino acid identities for the putative methyltransferases MecE and MecF were 64.0 and 66.7%,  
418 respectively. Accordingly, phylogenetic analysis revealed close relationships with *mecE* and *mecF* of the  
419 known DCM degraders (Figure S3). The deep subsurface *mec* cassettes were present in 2.8% of total  
420 estimated genome copies.

421

#### 422 *Genomes of chloroform-respiring organisms harbor mec gene orthologs*

423 The *mec* gene orthologs comprise cohesive, deeply branching clades (Figure S3). Aside from *mecJ*, no  
424 close homologs (i.e., proteins with >35% amino acid identity) to the *mec* genes are found in any publicly  
425 available bacterial or archaeal genomes, with three notable exceptions. Homologs of *mecA*, *mecB*, and  
426 *mecC* are found on genomes of the chloroform (CF) respirers *Dehalobacter* sp. strain CF and  
427 *Dehalobacter* sp. strain 11DCA, both of which were reported to generate DCM as an end product during  
428 growth with CF as electron acceptor (Grostern et al., 2010). In both of these genomes, the *mecABC*  
429 homologs are found immediately adjacent to the CF reductive dehalogenase and anchor protein encoding  
430 genes *cfrAB*, suggesting functional association between the two gene clusters. In the third case, a  
431 complete 10-gene *mec* cassette is located on the genome of *Dehalobacter* sp. strain UNSWDHB (Figure  
432 2), also a CF-respiring organism that lacks the ability to utilize DCM (Wong et al., 2016). Close inspection  
433 of the *mec* cassette of strain UNSWDHB reveals that *mecE*, implicated in the initial chloromethyltransfer  
434 reaction, is truncated at the 5' end, which is projected to lead to a ~70 amino acid shorter protein (Figure  
435 S4), consistent with a loss of function (Wong et al., 2016).

436

437

438 **Discussion**

439 *Identification DCM biomarker genes*

440 The 10 gene *mec* cassette was initially identified by comparative genomic analyses between the  
441 anaerobic DCM degrading bacteria *Dehalobacterium formicoaceticum* (Defo) and 'Ca.'  
442 *Dichloromethanomonas elyunquensis* (Diel). A third highly similar and syntenic gene cassette was also  
443 identified in the newer DCM degrader 'Ca.' *Formamonas warabiya* (Dcmf). This high degree of gene  
444 identity and gene order among DCM degraders and the near total absence of any closely-related gene  
445 cassette in any other bacterial genome placed strong suspicion on this gene cassette as being involved in  
446 anaerobic DCM catabolism. To confirm the association of these genes with anaerobic growth on DCM,  
447 additional enrichments were generated from municipal wastewater in Eastern Tennessee, which led to an  
448 increase in the abundance of *mec* genes from undetectable to levels similar to those seen in Defo and  
449 Diel cultures (1e6 to 1e8 gene copies per mL). *Mec* proteins were also among the most abundant  
450 proteins in the proteomes of DCM-grown Defo and Diel. Furthermore, it was observed that *mec* genes  
451 are enriched in the bacterial community at a DCM-contaminated groundwater site and were expressed in  
452 proportion to DCM concentration. The multiple lines of evidence espouse a strong and exclusive  
453 coordination between anaerobic DCM metabolism and *mec* cassette gene, transcript and protein  
454 abundance.

455

456 *Functional annotations of the mec cassette are consistent with a DCM dehalogenating methyltransferase*  
457 *system*

458 The DCM-degrading bacteria are strict anaerobes and no genes consistent with aerobic DCM catabolism  
459 by a GST (e.g., *dcmA*) were identified in the genomes of strains Defo, Diel, or Dcmf. Previous  
460 biochemical studies on Defo demonstrated that DCM is channeled into the WLP via methylene-THF  
461 catalyzed by a corrinoid methyltransferase (G. Chen et al., 2018, 2020; A Mägli et al., 1998; Andreas  
462 Mägli et al., 1996). Guided by functional annotation (Table 2) and comparison to analogous metabolic  
463 systems, the proteins encoded by the *mec* cassette genes may comprise a DCM catabolic pathway that is  
464 compatible with available biochemical evidence (Figure 6).





476 The core system involved in C<sub>1</sub> group transfer is likely composed of two methyltransferases, MecE and  
477 MecF, and a corrinoid-binding protein, MecB. MecE is a member of the MtaA/CmuA family (TIGR01463),  
478 an ortholog family defined by methylamine, methanol and chloromethane methyltransferases. The  
479 relationship with such methyltransferases, especially the chloromethane dehalogenase CmuA of the  
480 aerobic bacterium *Hyphomicrobium* sp. strain MC1 (Borodina et al., 2004), renders MecE a candidate for  
481 catalyzing the initial chloromethyltransfer reaction to remove one chlorine substituent from DCM.  
482 Chloromethane is dechlorinated by a corrinoid-dependent methyltransferase (CmuA), suggesting MecE  
483 could perform an analogous single dechlorination of DCM during C<sub>1</sub> group transfer to the corrinoid-  
484 binding protein MecB. Such a reaction would yield a hypothetical chloromethyl corrinoid protein (Figure  
485 6). Methyltransferase MecF is a member of the MtrH enzyme family responsible for transfer of a  
486 corrinoid-bound methyl group to the organic methyl carrier tetrahydromethanopterin (THMPT), a cofactor  
487 for C<sub>1</sub> transfer analogous to tetrahydrofolate (THF). MecF is the best candidate for the final  
488 methyltransfer reaction to THF generating methylene-THF, for which biochemical evidence exists (A  
489 Mägli et al., 1998). This methyltransfer reaction could lead to C-Cl bond cleavage and release of the  
490 second chlorine substituent. Alternatively, another methyltransferase, such as MecC or MecI, or another  
491 enzyme not necessarily conserved among all anaerobic DCM degraders, is involved in the release of the  
492 chlorine substituent. Previously, C and Cl stable isotope measurements provided evidence for distinct  
493 dechlorination mechanisms in anaerobic DCM degraders, and <sup>13</sup>C-tracer experiments demonstrated  
494 different end products, even though both Diel and Defo employ the WLP for DCM catabolism (G. Chen et  
495 al., 2018, 2020).

496

497 Features of the remaining *mec* cassette gene products suggest roles in support of the dehalogenating C<sub>1</sub>  
498 group transfer system and gene expression regulation. MecGH share domain organization with proteins  
499 implicated in activating the corrinoid-binding protein involved in methyltransferase-mediated methionine  
500 synthesis in a variety of bacteria (Price et al., 2018). Thus, MecGH may function as a reductive activator  
501 for MecB. MecJ is predicted to be a monovalent cation:proton antiporter, possibly supporting DCM  
502 catabolism by maintaining acid-base homeostasis (E Pinner, 1994; Roosild et al., 2010), counteracting  
503 acidification of the cytosol by hydrochloric acid (i.e., proton) generation during dechlorination of DCM



504 (Ferguson et al., 2000). Co-localization of dehalogenase genes (e.g., reductive dehalogenases, haloacid  
505 dehalogenases) and *mecJ* homologs is common among related organisms (Table S4), and the gene  
506 cluster *cmuABC* for aerobic chloromethane utilization is 6 kb upstream and in the same orientation of a  
507 gene (IMG ID 650984269) encoding a putative chloride carrier/channel (CIC) protein, a protein family also  
508 implicated in acid-base homeostasis (Iyer et al., 2002). The histidine kinase MecA likely represents a  
509 DCM sensor kinase that regulates the DNA-binding protein MecD following detection of DCM via the  
510 PocR domain (Anantharaman & Aravind, 2005). The high abundance of MecA sensor kinase in Defo and  
511 Diel proteomes (1<sup>st</sup> and 38<sup>th</sup> most abundant protein, respectively) may suggest an additional or alternative  
512 role. In the marine *mec* cassettes, the regulatory genes *mecA* and *mecD* were not detected; however, in  
513 two cases, homologs of *dcmR*, which encodes the DCM sensor and regulatory protein utilized by aerobic  
514 DCM degraders (La Roche & Leisinger, 1991), were identified directly adjacent to the *mec* cassette  
515 (Figure 7) and could fulfill regulatory functions.

516

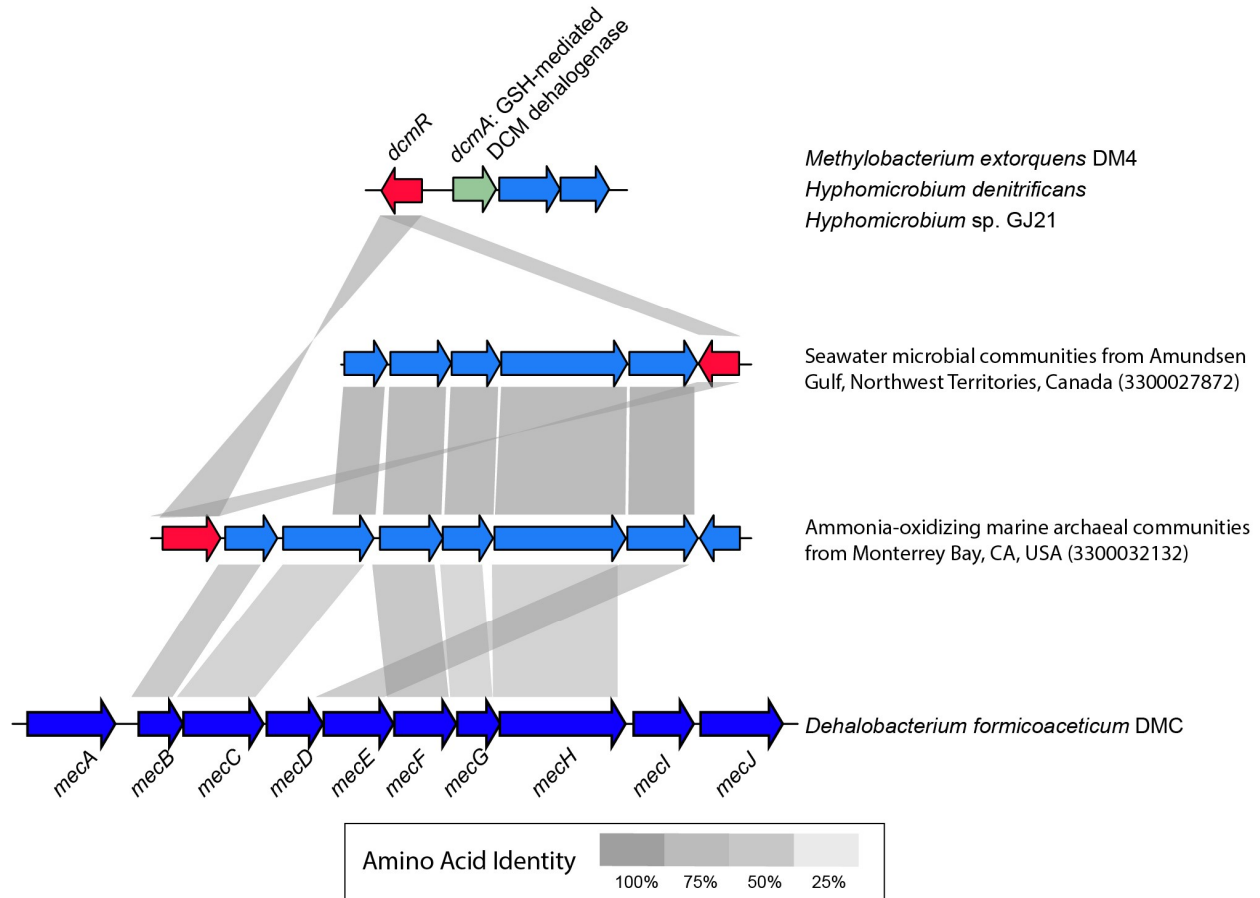

517

518 **Figure 7.** Two mec cassettes identified in metagenomes (from Monterey Bay and Amundsen  
 519 Gulf, CA) are flanked by genes, colored red, encoding proteins annotated as DcmR sensory  
 520 domain and regulator of DCM dehalogenase DcmA (KEGG K17071). The products of these  
 521 genes share 70.6% amino acid identity and are 44.6% - 46.4% identical to DcmR found in  
 522 *Methylbacterium extorquens* strain DM4. The indicated gene cassette (*dcmRA*) encodes  
 523 glutathione-mediated DCM dehalogenation.

524

525 The proposed involvement of additional methyltransferases (i.e., MecC and MecI) is not unprecedented.  
 526 For example, the chloromethane utilization gene cluster in *Hyphomicrobium* sp. strain MC1 also contains  
 527 a third putative methyltransferase encoding gene, *cmuC*, which is required for growth with chloromethane  
 528 but whose function has yet to be revealed (Vannelli et al., 1999). Methanol-grown *Desulfotomaculum*  
 529 *kuznetsovii*, which employs a similar methanol corrinoid methyltransferase system, also expresses three

530 methyltransferases all located in the same gene cluster (Sousa et al., 2018). Additional details of the  
531 functional annotations of the *mec* cassette genes are provided in Supplementary Information.  
532  
533 Highly similar *mec* cassettes are broadly distributed in the environment. A search of public metagenomes  
534 led to identification of *mec* cassettes in disparate ecosystems, including peatland, marine oxygen  
535 minimum zones, and the deep subsurface. However, there is good reason to suspect each of these  
536 environments as being hotspots for DCM flux. Peat bogs have been demonstrated to be rich in  
537 chlorinated organic material (Biester et al., 2004) and have been identified as a source of halomethanes  
538 (Dimmer et al., 2001). The occurrence of halomethanes in subsurface rock formations has been  
539 demonstrated (Mulder et al., 2013), although information about quantities and fluxes is lacking.  
540 Marine systems are net producers of DCM and considered major emitters to the atmosphere (Gribble,  
541 2010). In the water column, DCM concentrations peak along with chlorophyll concentrations (Ooki &  
542 Yokouchi, 2011), consistent with production by phytoplankton and the abiotic chlorination of planktonic  
543 iodo- and bromomethanes (Ooki & Yokouchi, 2011). DCM is detected beneath the photic zone (Ooki &  
544 Yokouchi, 2011), suggesting that mixing events carry DCM into deeper waters, or other sources of DCM  
545 exist in the deep ocean, possibly hydrothermal vents (Eklund et al., 1988; Isidorov et al., 1990; Jordan et  
546 al., 2000) or settling dead biomass (Wever & Barnett, 2017). Importantly, analysis of ETNP OMZ  
547 samples using targeted qPCR assays led to much high detection rate (9 of 11) than was obtained by  
548 metagenome analyses (16 of 90). This increase in frequency of detection is likely due to the higher  
549 sensitivity of qPCR compared to shotgun metagenomics (Suttner et al., 2020) and implies that the *mec*  
550 cassette is more broadly distributed in marine systems than the metagenomics survey results suggest.

551  
552 *Implications of widespread anaerobic DCM degradation potential*

553 DCM predates the anthropocene and the mechanisms underlying natural releases are far from fully  
554 characterized. Based on the available information, DCM is an energy source readily available to  
555 microorganisms in various environments, and the anaerobic microbial consumption of DCM is likely a  
556 major attenuation factor, eliminating DCM in anoxic systems prior to atmospheric release, and thus a  
557 relevant process for reducing DCM emissions. Environmental change, including global warming, has

558 high potential to alter the flux of DCM with unpredictable consequences for the integrity of the ozone  
559 layer. Whether low oxygen marine systems and peat bogs, for example, are net producers or net sinks of  
560 DCM is currently unclear. OMZs are expanding at accelerating rates worldwide (Stramma et al., 2008),  
561 and uncertainty exists over the impact of environmental change on net DCM emissions. Likewise, climate  
562 change induced melting of permafrost in the northern hemisphere will create more active peat bogs, and  
563 warming of peat bogs is expected to mobilize recalcitrant carbon and stimulate the breakdown of  
564 accumulated organic materials (Gill et al., 2017), which will likely increase halomethane, including DCM  
565 formation. As is the case with low oxygen marine systems, the degree to which DCM production is  
566 counterbalanced by consumption in peat bogs is unknown. A widely distributed phenotype for anaerobic  
567 DCM catabolism is likely to affect DCM pools, fluxes and thus the global DCM budget, which until present  
568 considers atmospheric releases and abiotic stratospheric breakdown, but not microbial attenuation (i.e.,  
569 sinks). The increased knowledge of microbial DCM catabolism offers opportunities to include relevant sink  
570 and attenuation terms and generate refined flux models with more predictive power.

571

572

### 573 **Acknowledgments**

574 We thank F. Stewart and A. Bertagnolli for valuable discussions and providing Eastern Tropical North  
575 Pacific Oxygen Minimum Zone DNA samples for qPCR analysis. T. Macbeth, K. Sorenson, and R.  
576 Cherenko from CDM Smith graciously provided groundwater samples and metatranscriptomic data from  
577 a DCM-contaminated site. The authors acknowledge N. Ivanova and R. Seshadri from the Joint Genome  
578 Institute for providing invaluable insight into use of the IMG database.

579

580 **Competing Interests:** Authors declare that they have no competing interests.

581 **Data and Code Availability:** All genomes, genes, and protein sequences studied are available in the  
582 IMG database (I.-M. A. Chen et al., 2019) under the specified ID numbers. Code used for data processing  
583 and figure creation is available via RPub links located in the methods section. All spectral data collected  
584 from the Defo axenic cultures used in this study have been deposited in the MASSIVE and  
585 ProteomeXchange repositories with identifiers MSV000087235 and PXD025479, respectively. Spectral

586 data collected from the Diel axenic cultures used in this study have been deposited in the MASSIVE and  
587 ProteomeXchange repositories with identifiers MSV000086520 and PXD022742, respectively. Scripts  
588 used to perform gene copy per genome copy calculations, pairwise gene cassette alignments, and to  
589 construct gene cassette synteny plots can be found at  
590 [https://rpubs.com/rmurdoch/mec\\_cassette\\_abundance\\_and\\_synteny](https://rpubs.com/rmurdoch/mec_cassette_abundance_and_synteny). Detailed description of gene  
591 phylogeny pipelines can be found at [https://rpubs.com/rmurdoch/mec\\_cassette\\_trees](https://rpubs.com/rmurdoch/mec_cassette_trees). Full  
592 metatranscriptome analysis pipeline description and scripts used to operate programs can be found at  
593 [https://rpubs.com/rmurdoch/mec\\_transcriptomes](https://rpubs.com/rmurdoch/mec_transcriptomes).

594

## 595 References

- 596  
597 Allocati, N., Federici, L., Masulli, M., & Di Ilio, C. (2009). Glutathione transferases in bacteria. In *FEBS*  
598 *Journal* (Vol. 276, Issue 1, pp. 58–75). John Wiley & Sons, Ltd. [https://doi.org/10.1111/j.1742-](https://doi.org/10.1111/j.1742-4658.2008.06743.x)  
599 [4658.2008.06743.x](https://doi.org/10.1111/j.1742-4658.2008.06743.x)
- 600 Altschul, S. F., Gish, W., Miller, W., Myers, E. W., & Lipman, D. J. (1990). Basic local alignment search  
601 tool. *Journal of Molecular Biology*, 215(3), 403–410. [https://doi.org/10.1016/S0022-2836\(05\)80360-2](https://doi.org/10.1016/S0022-2836(05)80360-2)
- 602 Anantharaman, V., & Aravind, L. (2005). MEDS and PocR are novel domains with a predicted role in  
603 sensing simple hydrocarbon derivatives in prokaryotic signal transduction systems. *Bioinformatics*,  
604 21(12), 2805–2811. <https://doi.org/10.1093/bioinformatics/bti418>
- 605 Bagnoud, A., Chourey, K., Hettich, R. L., de Bruijn, I., Andersson, A. F., Leupin, O. X., Schwyn, B., &  
606 Bernier-Latmani, R. (2016). Reconstructing a hydrogen-driven microbial metabolic network in  
607 Opalinus Clay rock. *Nature Communications*, 7(1), 12770. <https://doi.org/10.1038/ncomms12770>
- 608 Biester, H., Keppler, F., Putschew, A., Martinez-Cortizas, A., & Petri, M. (2004). Halogen retention,  
609 organohalogen, and the role of organic matter decomposition on halogen enrichment in two  
610 Chilean peat bogs. *Environmental Science and Technology*, 38(7), 1984–1991.  
611 <https://doi.org/10.1021/es0348492>
- 612 Bolger, A. M., Lohse, M., & Usadel, B. (2014). Trimmomatic: a flexible trimmer for Illumina sequence data.  
613 *Bioinformatics*, 30(15), 2114–2120. <https://doi.org/10.1093/bioinformatics/btu170>
- 614 Borodina, E., McDonald, I. R., & Murrell, J. C. (2004). Chloromethane-dependent expression of the *cmu*  
615 gene cluster of *Hyphomicrobium chloromethanicum*. *Applied and Environmental Microbiology*, 70(7),  
616 4177–4186. <https://doi.org/10.1128/AEM.70.7.4177-4186.2004>
- 617 Bray, N. L., Pimentel, H., Melsted, P., & Pachter, L. (2016). Near-optimal probabilistic RNA-seq  
618 quantification. *Nature Biotechnology*, 34(5), 525–527. <https://doi.org/10.1038/nbt.3519>
- 619 Capella-Gutiérrez, S., Silla-Martínez, J. M., & Gabaldón, T. (2009). trimAl: a tool for automated alignment  
620 trimming in large-scale phylogenetic analyses. *Bioinformatics (Oxford, England)*, 25(15), 1972–  
621 1973. <https://doi.org/10.1093/bioinformatics/btp348>
- 622 Chen, G., Fisch, A. R., Gibson, C. M., Mack, E. E., Erin, S., Seger, E. S., Campagna, S. R., Frank, F., &  
623 Löffler, E. (2020). Mineralization versus fermentation: evidence for two distinct anaerobic bacterial  
624 degradation pathways for dichloromethane. *The ISME Journal*, 14, 959–970.  
625 <https://doi.org/10.1038/s41396-019-0579-5>
- 626 Chen, G., Kleindienst, S., Griffiths, D. R., Mack, E. E., Seger, E. S., & Löffler, F. E. (2017). Mutualistic  
627 interaction between dichloromethane- and chloromethane-degrading bacteria in an anaerobic mixed  
628 culture. *Environmental Microbiology*, 19(11), 4784–4796. <https://doi.org/10.1111/1462-2920.13945>
- 629 Chen, G., Murdoch, R. W., Mack, E. E., Seger, E. S., & Löffler, F. E. (2017). Complete genome sequence  
630 of *Dehalobacterium formicoaceticum* strain DMC, a strictly anaerobic dichloromethane-degrading

- 631 bacterium. *Genome Announcements*, 5(37). <https://doi.org/10.1128/genomeA.00897-17>
- 632 Chen, G., Shouakar-Stash, O., Phillips, E., Justicia-Leon, S. D., Gilevska, T., Sherwood Lollar, B., Mack,  
633 E. E., Seger, E. S., & Löffler, F. E. (2018). Dual carbon–chlorine isotope analysis indicates distinct  
634 anaerobic dichloromethane degradation pathways in two members of Peptococcaceae.  
635 *Environmental Science & Technology*, 52(15), 8607–8616. <https://doi.org/10.1021/acs.est.8b01583>
- 636 Chen, I.-M. A., Chu, K., Palaniappan, K., Pillay, M., Ratner, A., Huang, J., Huntemann, M., Varghese, N.,  
637 White, J. R., Seshadri, R., Smirnova, T., Kirton, E., Jungbluth, S. P., Woyke, T., Eloë-Fadrosch, E. A.,  
638 Ivanova, N. N., & Kyrpides, N. C. (2019). IMG/M v.5.0: an integrated data management and  
639 comparative analysis system for microbial genomes and microbiomes. *Nucleic Acids Research*,  
640 47(D1), D666–D677. <https://doi.org/10.1093/nar/gky901>
- 641 Cox, M. L., Fraser, P. J., Sturrock, G. A., Siems, S. T., & Porter, L. W. (2004). Terrestrial sources and  
642 sinks of halomethanes near Cape Grim, Tasmania. *Atmospheric Environment*, 38(23), 3839–3852.  
643 <https://doi.org/10.1016/J.ATMOENV.2004.03.050>
- 644 Dimmer, C. H., Simmonds, P. G., Nickless, G., & Bassford, M. R. (2001). Biogenic fluxes of  
645 halomethanes from Irish peatland ecosystems. *Atmospheric Environment*, 35(2), 321–330.  
646 [https://doi.org/10.1016/S1352-2310\(00\)00151-5](https://doi.org/10.1016/S1352-2310(00)00151-5)
- 647 E Pinner, E. P. and S. S. (1994). Kinetic properties of NhaB, a Na<sup>+</sup>/H<sup>+</sup> antiporter from Escherichia coli.  
648 *The Journal of Biological Chemistry*, 269, 26274–26279.  
649 [http://www.jbc.org/content/268/8/5382?ijkey=264978fabe3ca92c7251ed45ef58e1776e4abe69&key](http://www.jbc.org/content/268/8/5382?ijkey=264978fabe3ca92c7251ed45ef58e1776e4abe69&keytype=tf_ipsecsha)  
650 [type2=tf\\_ipsecsha](http://www.jbc.org/content/268/8/5382?ijkey=264978fabe3ca92c7251ed45ef58e1776e4abe69&keytype=tf_ipsecsha)
- 651 Eklund, G., Pedersen, J. R., & Stromberg, B. (1988). Methane, hydrogen chloride and oxygen form a  
652 wide range of chlorinated organic species in the temperature range 400°C-950°C. *Chemosphere*,  
653 17(3), 575–586.
- 654 El-Gebali, S., Mistry, J., Bateman, A., Eddy, S. R., Luciani, A., Potter, S. C., Qureshi, M., Richardson, L.  
655 J., Salazar, G. A., Smart, A., Sonnhammer, E. L. L., Hirsh, L., Paladin, L., Piovesan, D., Tosatto, S.  
656 C. E., & Finn, R. D. (2019). The Pfam protein families database in 2019. *Nucleic Acids Research*,  
657 47, D427–D432. <https://doi.org/10.1093/nar/gky995>
- 658 Eng, J. K., McCormack, A. L., & Yates, J. R. (1994). An approach to correlate tandem mass spectral data  
659 of peptides with amino acid sequences in a protein database. *Journal of the American Society for*  
660 *Mass Spectrometry*, 5(11), 976–989. [https://doi.org/10.1016/1044-0305\(94\)80016-2](https://doi.org/10.1016/1044-0305(94)80016-2)
- 661 Eustáquio, A. S., Pojer, F., Noel, J. P., & Moore, B. S. (2008). Discovery and characterization of a marine  
662 bacterial SAM-dependent chlorinase. *Nature Chemical Biology*, 4(1), 69–74.  
663 <https://doi.org/10.1038/nchembio.2007.56>
- 664 Ferguson, G. P., Booth, I. R., Evans, G. J., & Vuilleumier, S. (2000). Growth inhibition of Escherichia coli  
665 by dichloromethane in cells expressing dichloromethane dehalogenase/glutathione S-transferase.  
666 *Microbiology*, 146(11), 2967–2975. <https://doi.org/10.1099/00221287-146-11-2967>
- 667 Ganusova, E. E., Vo, L. T., Abraham, P. E., O’Neal Yoder, L., Hettich, R. L., & Alexandre, G. (2021). The  
668 Azospirillum brasilense core chemotaxis proteins CheA1 and CheA4 link chemotaxis signaling with  
669 nitrogen metabolism. *MSystems*, 6(1). <https://doi.org/10.1128/msystems.01354-20>
- 670 Gill, A. L., Giasson, M.-A., Yu, R., & Finzi, A. C. (2017). Deep peat warming increases surface methane  
671 and carbon dioxide emissions in a black spruce-dominated ombrotrophic bog. *Global Change*  
672 *Biology*, 23(12), 5398–5411. <https://doi.org/10.1111/gcb.13806>
- 673 Gossett, J. M. (1987). Measurement of Henry’s Law constants for C1 and C2 chlorinated hydrocarbons.  
674 *Environmental Science and Technology*, 21(2), 202–208. <https://doi.org/10.1021/es00156a012>
- 675 Grabherr, M. G., Haas, B. J., Yassour, M., Levin, J. Z., Thompson, D. A., Amit, I., Adiconis, X., Fan, L.,  
676 Raychowdhury, R., Zeng, Q., Chen, Z., Mauceli, E., Hacohen, N., Gnirke, A., Rhind, N., Di Palma,  
677 F., Birren, B. W., Nusbaum, C., Lindblad-Toh, K., ... Regev, A. (2011). Full-length transcriptome  
678 assembly from RNA-Seq data without a reference genome. *Nature Biotechnology*, 29(7), 644–652.  
679 <https://doi.org/10.1038/nbt.1883>
- 680 Gribble, G. W. (2010). *Naturally Occurring Organohalogen Compounds - A Comprehensive Update* (Vol.  
681 91). Springer Vienna. <https://doi.org/10.1007/978-3-211-99323-1>
- 682 Grostern, A., Duhamel, M., Dworatzek, S., & Edwards, E. A. (2010). Chloroform respiration to  
683 dichloromethane by a Dehalobacter population. *Environmental Microbiology*, 12(4), 1053–1060.  
684 <https://doi.org/10.1111/j.1462-2920.2009.02150.x>
- 685 Guy, L., Roat Kultima, J., & Andersson, S. G. E. (2010). genoPlotR: comparative gene and genome  
686 visualization in R. *Bioinformatics*, 26(18), 2334–2335. <https://doi.org/10.1093/bioinformatics/btq413>



- 687 Haft, D. H., Selengut, J. D., Richter, R. A., Harkins, D., Basu, M. K., & Beck, E. (2012). TIGRFAMs and  
688 Genome Properties in 2013. *Nucleic Acids Research*, *41*(D1), D387–D395.  
689 <https://doi.org/10.1093/nar/gks1234>
- 690 Haines, A., Ebi, K. L., Ph, D., Li, S., & Ph, D. (2020). Wildfires, global climate change, and human health.  
691 *The New England Journal of Medicine*, *383*, 2173–2181.
- 692 Hatt, J. K., & Löffler, F. E. (2012). Quantitative real-time PCR (qPCR) detection chemistries affect  
693 enumeration of the *Dehalococcoides* 16S rRNA gene in groundwater. *Journal of Microbiological*  
694 *Methods*, *88*(2), 263–270. <https://doi.org/10.1016/j.mimet.2011.12.005>
- 695 Hoekstra, E. J., M Verhagen, F. J., Field, J. A., B De Leer, E. W., & Th Brinkman, U. A. (1998). Natural  
696 production of chloroform by fungi. *Phytochemistry*, *49*(1), 91–97.
- 697 Holland, S. I., Edwards, R. J., Ertan, H., Wong, Y. K., Russell, T. L., Deshpande, N. P., Manefield, M., &  
698 Lee, M. J. (2019). Whole genome sequencing of a novel, dichloromethane-fermenting  
699 Peptococcaceae from an enrichment culture. *PeerJ*, *7*, e7775.  
700 <https://doi.org/10.7287/peerj.preprints.27718v1>
- 701 Holland, S. I., Ertan, H., Montgomery, K., Manefield, M. J., & Lee, M. (2021). Novel dichloromethane-  
702 fermenting bacteria in the Peptococcaceae family. *The ISME Journal*, *15*, 1709–1721.  
703 <https://doi.org/10.1038/s41396-020-00881-y>
- 704 Hossaini, R., Chipperfield, M. P., Montzka, S. A., Leeson, A. A., Dhomse, S. S., & Pyle, J. A. (2017). The  
705 increasing threat to stratospheric ozone from dichloromethane. *Nature Communications*, *8*(1),  
706 15962. <https://doi.org/10.1038/ncomms15962>
- 707 Hu, S., Niu, Z., Chen, Y., Li, L., & Zhang, H. (2017). Global wetlands: Potential distribution, wetland loss,  
708 and status. *Science of The Total Environment*, *586*, 319–327.  
709 <https://doi.org/10.1016/J.SCITOTENV.2017.02.001>
- 710 Isidorov, V. A., Zenkevich, I. G., & Ioffe, B. V. (1990). Volatile organic compounds in solfataric gases.  
711 *Journal of Atmospheric Chemistry*, *10*, 329.  
712 <https://link.springer.com/content/pdf/10.1007%2FBF00053867.pdf>
- 713 Iyer, R., Iverson, T. M., Accardi, A., & Miller, C. (2002). A biological role for prokaryotic ClC chloride  
714 channels. *Nature*, *419*(6908), 715–718. <https://doi.org/10.1038/nature01000>
- 715 Jordan, A., Harnisch, J., Borchers, R., Le Guern, F., & Shinohar, H. (2000). Volcanogenic halocarbons.  
716 *Environmental Science & Technology*, *34*(6), 1122–1124. <https://doi.org/10.1021/ES990838Q>
- 717 Justicia-Leon, S. D., Ritalahti, K. M., Mack, E. E., & Löffler, F. E. (2012). Dichloromethane fermentation by  
718 a *Dehalobacter* sp. in an enrichment culture derived from pristine river sediment. *Applied and*  
719 *Environmental Microbiology*, *78*(4), 1288–1291. <https://doi.org/10.1128/AEM.07325-11>
- 720 Käll, L., Canterbury, J. D., Weston, J., Noble, W. S., & MacCoss, M. J. (2007). Semi-supervised learning  
721 for peptide identification from shotgun proteomics datasets. *Nature Methods*, *4*(11), 923–925.  
722 <https://doi.org/10.1038/nmeth1113>
- 723 Kanehisa, M., Furumichi, M., Tanabe, M., Sato, Y., & Morishima, K. (2017). KEGG: new perspectives on  
724 genomes, pathways, diseases and drugs. *Nucleic Acids Research*, *45*(D1), D353–D361.  
725 <https://doi.org/10.1093/nar/gkw1092>
- 726 Kanehisa, M., Sato, Y., & Morishima, K. (2016). BlastKOALA and GhostKOALA: KEGG tools for  
727 functional characterization of genome and metagenome sequences. *Journal of Molecular Biology*,  
728 *428*(4), 726–731. <https://doi.org/10.1016/j.jmb.2015.11.006>
- 729 Kanters, J., & Louw, R. (1996). Thermal and catalysed halogenation in combustion reactions.  
730 *Chemosphere*, *32*(1), 89–97. [https://doi.org/10.1016/0045-6535\(95\)00230-8](https://doi.org/10.1016/0045-6535(95)00230-8)
- 731 Katoh, K., & Standley, D. M. (2013). MAFFT multiple sequence alignment software version 7:  
732 improvements in performance and usability. *Molecular Biology and Evolution*, *30*(4), 772–780.  
733 <https://doi.org/10.1093/molbev/mst010>
- 734 Kearse, M., Moir, R., Wilson, A., Stones-Havas, S., Cheung, M., Sturrock, S., Buxton, S., Cooper, A.,  
735 Markowitz, S., Duran, C., Thierer, T., Ashton, B., Meintjes, P., Drummond, A., & Valencia, A. (2012).  
736 Geneious Basic: An integrated and extendable desktop software platform for the organization and  
737 analysis of sequence data. *Bioinformatics (Oxford, England)*, *28*(12), 1647–1649.  
738 <https://doi.org/10.1093/bioinformatics/bts199>
- 739 Kleindienst, S., Higgins, S. A., Tsementzi, D., Chen, G., Konstantinidis, K. T., Mack, E. E., & Löffler, F. E.  
740 (2017). ‘*Candidatus* Dichloromethanomonas elyunquensis’ gen. nov., sp. nov., a dichloromethane-  
741 degrading anaerobe of the Peptococcaceae family. *Systematic and Applied Microbiology*, *40*(3),  
742 150–159. <https://doi.org/10.1016/j.syapm.2016.12.001>

- 743 Kleindienst, S., Higgins, S. A., Tsementzi, D., Konstantinidis, K. T., Mack, E. E., & Löffler, F. E. (2016).  
744 Draft genome sequence of a strictly anaerobic dichloromethane-degrading bacterium. *Genome*  
745 *Announcements*, 4(2), e00037-16. <https://doi.org/10.1128/GENOMEA.00037-16>
- 746 Kolusu, S. R., Schlünzen, K. H., Grawe, D., & Seifert, R. (2018). Determination of chloromethane and  
747 dichloromethane in a tropical terrestrial mangrove forest in Brazil by measurements and modelling.  
748 *Atmospheric Environment*, 173, 185–197. <https://doi.org/10.1016/J.ATMOSENV.2017.10.057>
- 749 La Roche, S. D., & Leisinger, T. (1991). Identification of dcmR, the regulatory gene governing expression  
750 of dichloromethane dehalogenase in *Methylobacterium* sp. strain DM4. *Journal of Bacteriology*,  
751 173(21), 6714–6721. <http://jb.asm.org/>
- 752 Lane, D. J. (1991). 16S/23S rRNA sequencing. In Stackebrandt & M. Goodfellow (Eds.), *Nucleic acid*  
753 *techniques in bacterial systematics* (pp. 115–175). John Wiley & Sons, Ltd.
- 754 Letunic, I., & Bork, P. (2016). Interactive tree of life (iTOL) v3: an online tool for the display and annotation  
755 of phylogenetic and other trees. *Nucleic Acids Research*, 44(W1), W242–W245.  
756 <https://doi.org/10.1093/nar/gkw290>
- 757 Li, W., & Godzik, A. (2006). Cd-hit: a fast program for clustering and comparing large sets of protein or  
758 nucleotide sequences. *Bioinformatics*, 22(13), 1658–1659.  
759 <https://doi.org/10.1093/bioinformatics/btl158>
- 760 Löffler, F. E., Sanford, R. A., & Ritalahti, K. M. (2005). Enrichment, cultivation, and detection of reductively  
761 dechlorinating bacteria. *Methods in Enzymology*, 397, 77–111. [https://doi.org/10.1016/S0076-6879\(05\)97005-5](https://doi.org/10.1016/S0076-6879(05)97005-5)
- 762 Mägli, A., Messmer, M., & Leisinger, T. (1998). Metabolism of dichloromethane by the strict anaerobe  
763 *Dehalobacterium formicoaceticum*. *Applied and Environmental Microbiology*, 64(2), 646–650.  
764 <http://www.ncbi.nlm.nih.gov/pubmed/16349505>
- 765 Mägli, Andreas, Wendt, M., & Leisinger, T. (1996). Isolation and characterization of *Dehalobacterium*  
766 *formicoaceticum* gen. nov. sp. nov., a strictly anaerobic bacterium utilizing dichloromethane as  
767 source of carbon and energy. *Archives of Microbiology*, 166(2), 101–108.  
768 <https://doi.org/10.1007/s002030050362>
- 769 McCulloch, A. (2017). *Dichloromethane in the environment: A note prepared for the European*  
770 *Chlorinated Solvents Association (ECSA) and the Halogenated Solvents Industry Alliance (HSIA)*.  
771 [http://www.chlorinated-solvents.eu/images/Documents/Newsroom/Dichloromethane paper.pdf](http://www.chlorinated-solvents.eu/images/Documents/Newsroom/Dichloromethane%20paper.pdf)
- 772 Mulder, I., Huber, S. G., Krause, T., Zetzsch, C., Kotte, K., Dultz, S., & Schöler, H. F. (2013). A new purge  
773 and trap headspace technique to analyze low volatile compounds from fluid inclusions of rocks and  
774 minerals. *Chemical Geology*, 358, 148–155. <https://doi.org/10.1016/J.CHEMGEO.2013.09.003>
- 775 Muller, E. E. L., Bringel, F., & Vuilleumier, S. (2011). Dichloromethane-degrading bacteria in the genomic  
776 age. *Research in Microbiology*, 162(9), 869–876. <https://doi.org/10.1016/J.RESMIC.2011.01.008>
- 777 Muyzer, G., De Waal, E. C., & Uitterlinden, A. G. (1993). Profiling of complex microbial populations by  
778 denaturing gradient gel electrophoresis analysis of polymerase chain reaction-amplified genes  
779 coding for 16S rRNA. *Applied and Environmental Microbiology*, 59(3), 695–700.  
780 <https://doi.org/10.1128/aem.59.3.695-700.1993>
- 781 Ooki, A., & Yokouchi, Y. (2011). Dichloromethane in the Indian Ocean: Evidence for in-situ production in  
782 seawater. *Marine Chemistry*, 124(1–4), 119–124. <https://doi.org/10.1016/J.MARCHEM.2011.01.001>
- 783 Pagès, H., Aboyoun, P., Gentleman, R., & DebRoy, S. (2019). *Biostrings: Efficient manipulation of*  
784 *biological strings* (R package version 2.54.0).
- 785 Petkau, A., Stuart-Edwards, M., Stothard, P., & Van Domselaar, G. (2010). Interactive microbial genome  
786 visualization with GView. *Bioinformatics*, 26(24), 3125–3126.  
787 <https://doi.org/10.1093/bioinformatics/btq588>
- 788 Price, M. N., Dehal, P. S., & Arkin, A. P. (2010). FastTree 2 – Approximately maximum-likelihood trees for  
789 large alignments. *PLOS ONE*, 5(3), e9490. <https://doi.org/10.1371/journal.pone.0009490>
- 790 Price, M. N., Zane, G. M., Kuehl, J. V., Melnyk, R. A., Wall, J. D., Deutschbauer, A. M., & Arkin, A. P.  
791 (2018). Filling gaps in bacterial amino acid biosynthesis pathways with high-throughput genetics.  
792 *PLOS Genetics*, 14(1), e1007147. <https://doi.org/10.1371/journal.pgen.1007147>
- 793 Ritalahti, K. M., Amos, B. K., Sung, Y., Wu, Q., Koenigsberg, S. S., & Löffler, F. E. (2006). Quantitative  
794 PCR targeting 16S rRNA and reductive dehalogenase genes simultaneously monitors multiple  
795 *Dehalococcoides* strains. *Applied and Environmental Microbiology*, 72(4), 2765–2774.  
796 <https://doi.org/10.1128/AEM.72.4.2765-2774.2006>
- 797 Roosild, T. P., Castronovo, S., Healy, J., Miller, S., Pliotas, C., Rasmussen, T., Bartlett, W., Conway, S.



- 799 J., & Booth, I. R. (2010). Mechanism of ligand-gated potassium efflux in bacterial pathogens.  
800 *Proceedings of the National Academy of Sciences of the United States of America*, 107(46), 19784–  
801 19789. <https://doi.org/10.1073/pnas.1012716107>
- 802 Seeman, T. (2018). *tseemann/barrnap: Bacterial ribosomal RNA predictor (0.9-2)*.  
803 <https://github.com/tseemann/barrnap>
- 804 Sousa, D. Z., Visser, M., van Gelder, A. H., Boeren, S., Pieterse, M. M., Pinkse, M. W. H., Verhaert, P. D.  
805 E. M., Vogt, C., Franke, S., Kümmel, S., & Stams, A. J. M. (2018). The deep-subsurface sulfate  
806 reducer *Desulfotomaculum kuznetsovii* employs two methanol-degrading pathways. *Nature*  
807 *Communications*, 9(1), 239. <https://doi.org/10.1038/s41467-017-02518-9>
- 808 Stramma, L., Johnson, G. C., Sprintall, J., & Mohrholz, V. (2008). Expanding oxygen-minimum zones in  
809 the tropical oceans. *Science*, 320(5876), 655–658. <https://doi.org/10.1126/science.1153847>
- 810 Suttner, B. J., Johnston, E. R., Orellana, L. H., Rodriguez-R, L. M., Hatt, J. K., Carychao, D., Carter, M.  
811 Q., & Cooley, M. B. (2020). Potential and limitations of metagenomics as a public health risk  
812 assessment tool in a study of natural creek sediments influenced by agricultural and livestock runoff.  
813 *Appl. Environ. Microbiol.*, 86(6), e02525-19. <https://doi.org/10.1128/AEM.02525-19>
- 814 Svensen, H., Planke, S., Polozov, A. G., Schmidbauer, N., Corfu, F., Podladchikov, Y. Y., & Jamtveit, B.  
815 (2009). Siberian gas venting and the end-Permian environmental crisis. *Earth and Planetary*  
816 *Science Letters*, 277(3–4), 490–500. <https://doi.org/10.1016/J.EPSL.2008.11.015>
- 817 Tatusov, R. L., Galperin, M. Y., Natale, D. A., & Koonin, E. V. (2000). The COG database: a tool for  
818 genome-scale analysis of protein functions and evolution. *Nucleic Acids Research*, 28(1), 33–36.  
819 <https://www.ncbi.nlm.nih.gov/pmc/articles/PMC102395/>
- 820 Thamdrup, B., Steinsdóttir, H. G. R., Bertagnolli, A. D., Padilla, C. C., Patin, N. V., Garcia-Robledo, E.,  
821 Bristow, L. A., & Stewart, F. J. (2019). Anaerobic methane oxidation is an important sink for  
822 methane in the ocean's largest oxygen minimum zone. *Limnology and Oceanography*, 64(6), 2569–  
823 2585. <https://doi.org/10.1002/lno.11235>
- 824 Trudinger, C. M., Etheridge, D. M., Sturrock, G. A., Fraser, P. J., Krummel, P. B., McCulloch, A., &  
825 Etheridge, M. (2004). Atmospheric histories of halocarbons from analysis of Antarctic firn air: Methyl  
826 bromide, methyl chloride, chloroform, and dichloromethane. *J. Geophys. Res.*, 109, 22310.  
827 <https://doi.org/10.1029/2004JD004932>
- 828 Vannelli, T., Messmer, M., Studer, A., Vuilleumier, S., & Leisinger, T. (1999). A corrinoid-dependent  
829 catabolic pathway for growth of a *Methylobacterium* strain with chloromethane. *Proceedings of the*  
830 *National Academy of Sciences of the United States of America*, 96(8), 4615–4620.  
831 <https://doi.org/10.1073/pnas.96.8.4615>
- 832 Vit, O., & Petrak, J. (2017). Integral membrane proteins in proteomics. How to break open the black box?  
833 *Journal of Proteomics*, 153, 8–20. <https://doi.org/10.1016/J.JPROT.2016.08.006>
- 834 Wever, R., & Barnett, P. (2017). Vanadium chloroperoxidases: The missing link in the formation of  
835 chlorinated compounds and chloroform in the terrestrial environment? *Chemistry - An Asian Journal*,  
836 12(16), 1997–2007. <https://doi.org/10.1002/asia.201700420>
- 837 Wiechmann, A., Ciurus, S., Oswald, F., Seiler, V. N., & Müller, V. (2020). It does not always take two to  
838 tango: “Syntrophy” via hydrogen cycling in one bacterial cell. *ISME Journal*, 14(6), 1561–1570.  
839 <https://doi.org/10.1038/s41396-020-0627-1>
- 840 Wong, Y. K., Holland, S. I., Ertan, H., Manefield, M., & Lee, M. (2016). Isolation and characterization of  
841 *Dehalobacter* sp. strain UNSWDHB capable of chloroform and chlorinated ethane respiration.  
842 *Environmental Microbiology*, 18(9), 3092–3105. <https://doi.org/10.1111/1462-2920.13287>
- 843 Wright, J., Kirchner, V., Bernard, W., Ulrich, N., McLimans, C., Campa, M. F., Hazen, T., Macbeth, T.,  
844 Marabello, D., McDermott, J., Mackelprang, R., Roth, K., & Lamendella, R. (2017). Bacterial  
845 community dynamics in dichloromethane-contaminated groundwater undergoing natural attenuation.  
846 *Frontiers in Microbiology*, 8, 2300. <https://doi.org/10.3389/fmicb.2017.02300>
- 847 Wu, S., Zhu, Z., Fu, L., Niu, B., & Li, W. (2011). WebMGA: a customizable web server for fast  
848 metagenomic sequence analysis. *BMC Genomics*, 12(1), 444. <https://doi.org/10.1186/1471-2164-12-444>
- 849
- 850 Wuosmaa, A. M., & Hager, L. P. (1990). Methyl chloride transferase: A carbocation route for biosynthesis  
851 of halometabolites. *Science*, 249(4965), 160–162. [https://www.jstor-](https://www.jstor-org.proxy.lib.utk.edu/stable/pdf/2874545.pdf?refreqid=excelsior%3Ae86ae7d382fcc008630b1329bb)  
852 [org.proxy.lib.utk.edu/stable/pdf/2874545.pdf?refreqid=excelsior%3Ae86ae7d382fcc008630b1329bb](https://www.jstor-org.proxy.lib.utk.edu/stable/pdf/2874545.pdf?refreqid=excelsior%3Ae86ae7d382fcc008630b1329bb)  
853 [b843ee](https://www.jstor-org.proxy.lib.utk.edu/stable/pdf/2874545.pdf?refreqid=excelsior%3Ae86ae7d382fcc008630b1329bb)
- 854 Yang, S., Giannone, R. J., Dice, L., Yang, Z. K., Engle, N. L., Tschaplinski, T. J., Hettich, R. L., & Brown,

855 S. D. (2012). Clostridium thermocellum ATCC27405 transcriptomic, metabolomic and proteomic  
856 profiles after ethanol stress. *BMC Genomics*, 13(1), 336. <https://doi.org/10.1186/1471-2164-13-336>  
857

858
